# Supplementary material for: Profile of trauma mortality and trauma care resources at rural emergency departments and urban trauma centres in Quebec: a population-based, retrospective cohort study
Source: PubMed Central journal article supplement — BMJ Open. 2019 Jun 2;9(6):e028512. doi: 10.1136/bmjopen-2018-028512 (PMC6549736; doi:10.1136/bmjopen-2018-028512), 2019-06-02
Supplement: bmjopen-2018-028512.draft_revisions.pdf [file bmjopen-2018-028512.draft_revisions.pdf]

# BMJ Open

BMJ Open is committed to open peer review. As part of this commitment we make the peer review history of every article we publish publicly available.

When an article is published we post the peer reviewers' comments and the authors' responses online. We also post the versions of the paper that were used during peer review. These are the versions that the peer review comments apply to.

The versions of the paper that follow are the versions that were submitted during the peer review process. They are not the versions of record or the final published versions. They should not be cited or distributed as the published version of this manuscript.

BMJ Open is an open access journal and the full, final, typeset and author-corrected version of record of the manuscript is available on our site with no access controls, subscription charges or pay-per-view fees (<http://bmjopen.bmj.com>).

If you have any questions on BMJ Open's open peer review process please email [info.bmjopen@bmj.com](mailto:info.bmjopen@bmj.com)

# BMJ Open

## Profile of trauma mortality and trauma care resources at rural emergency departments and urban trauma centres in Quebec: a population-based retrospective cohort study

|                               |                                                                                                                                                                                                                                                                                                                                                                                                                                                                                                                                                                                                                                                                                                                                                                                                                                                                                                                                                                                                                                                                                                                                                                                                                                                                                                                                                        |
|-------------------------------|--------------------------------------------------------------------------------------------------------------------------------------------------------------------------------------------------------------------------------------------------------------------------------------------------------------------------------------------------------------------------------------------------------------------------------------------------------------------------------------------------------------------------------------------------------------------------------------------------------------------------------------------------------------------------------------------------------------------------------------------------------------------------------------------------------------------------------------------------------------------------------------------------------------------------------------------------------------------------------------------------------------------------------------------------------------------------------------------------------------------------------------------------------------------------------------------------------------------------------------------------------------------------------------------------------------------------------------------------------|
| Journal:                      | <i>BMJ Open</i>                                                                                                                                                                                                                                                                                                                                                                                                                                                                                                                                                                                                                                                                                                                                                                                                                                                                                                                                                                                                                                                                                                                                                                                                                                                                                                                                        |
| Manuscript ID                 | bmjopen-2018-028512                                                                                                                                                                                                                                                                                                                                                                                                                                                                                                                                                                                                                                                                                                                                                                                                                                                                                                                                                                                                                                                                                                                                                                                                                                                                                                                                    |
| Article Type:                 | Research                                                                                                                                                                                                                                                                                                                                                                                                                                                                                                                                                                                                                                                                                                                                                                                                                                                                                                                                                                                                                                                                                                                                                                                                                                                                                                                                               |
| Date Submitted by the Author: | 11-Dec-2018                                                                                                                                                                                                                                                                                                                                                                                                                                                                                                                                                                                                                                                                                                                                                                                                                                                                                                                                                                                                                                                                                                                                                                                                                                                                                                                                            |
| Complete List of Authors:     | <p>Fleet, Richard; Université Laval, Médecine familiale et médecine d'urgence; Chaire de recherche en médecine d'urgence ULaval - CISSS Chaudière-Appalaches, Centre de recherche du CISSS Chaudière-Appalaches</p> <p>Lauzier, François; Centre de Recherche du CHU de Québec - Université Laval, Population Health and Optimal Health Practices Research Unit (Trauma - Emergency - Critical Care Medicine); Université Laval, Department of Anesthesiology and Critical Care Medicine</p> <p>Toukara, Fatoumata; Chaire de recherche en médecine d'urgence ULaval - CISSS Chaudière-Appalaches, Centre de recherche du CISSS Chaudière-Appalaches</p> <p>Turcotte, Stéphane; Centre de recherche du CISSS Chaudière-Appalaches</p> <p>Poitras, Julien; Université Laval,</p> <p>Morris, Judy; HSCM, Emergency Medicine</p> <p>Ouimet, Mathieu; Université Laval, Sciences politiques</p> <p>Fortin, Jean-Paul; Centre intégré universitaire de santé et de services sociaux de la Capitale-Nationale</p> <p>Plant, Jeff; University of British Columbia</p> <p>Légaré, France; Université Laval, Médecine familiale</p> <p>Dupuis, Gilles; Université du Québec à Montréal,</p> <p>Turgeon-Pelchat, Catherine; Chaire de recherche en médecine d'urgence ULaval - CISSS Chaudière-Appalaches, Centre de recherche du CISSS Chaudière-Appalaches</p> |
| Keywords:                     | ACCIDENT & EMERGENCY MEDICINE, Organisation of health services < HEALTH SERVICES ADMINISTRATION & MANAGEMENT, INTENSIVE & CRITICAL CARE, TRAUMA MANAGEMENT                                                                                                                                                                                                                                                                                                                                                                                                                                                                                                                                                                                                                                                                                                                                                                                                                                                                                                                                                                                                                                                                                                                                                                                             |
|                               |                                                                                                                                                                                                                                                                                                                                                                                                                                                                                                                                                                                                                                                                                                                                                                                                                                                                                                                                                                                                                                                                                                                                                                                                                                                                                                                                                        |

SCHOLARONE™  
Manuscripts

**MANUSCRIPT TITLE:** Profile of trauma mortality and trauma care resources at rural emergency departments and urban trauma centres in Quebec: a population-based retrospective cohort study

**AUTHOR NAMES AND AFFILIATIONS:** Richard Fleet, MD, PhD;<sup>1,2</sup> François Lauzier, MD, MSc, FRCPC;<sup>3,4</sup> Fatoumata Korinka Tounkara, MSc;<sup>1</sup> Stéphane Turcotte, MSc;<sup>2</sup> Julien Poitras, MD;<sup>5</sup> Judy Morris, MD, MSc;<sup>6</sup> Mathieu Ouimet, PhD;<sup>7</sup> Jean-Paul Fortin, MD;<sup>5,8</sup> Jeff Plant, MD;<sup>9</sup> France Légaré, MD, PhD;<sup>3,5</sup> Gilles Dupuis, PhD;<sup>10</sup> Catherine Turgeon-Pelchat, MA<sup>1</sup>

<sup>1</sup>Chaire de recherche en médecine d'urgence Université Laval – CISSS Chaudière-Appalaches, Laval University, Québec, QC, Canada. <sup>2</sup>Centre de recherche du CISSS Chaudière-Appalaches, Lévis, QC, Canada. <sup>3</sup>Centre de Recherche du CHU de Québec, Laval University, Québec, QC, Canada. <sup>4</sup>Department of Anesthesiology and Critical Care Medicine, Division of Critical Care Medicine, Laval University, Québec, QC, Canada. <sup>5</sup>Faculty of Medicine, Laval University, Québec, QC, Canada. <sup>6</sup>Faculty of Medicine, Université de Montréal, Montréal, QC, Canada. <sup>7</sup>Département de sciences politiques, Université Laval, Québec, QC, Canada. <sup>8</sup>Centre de recherche sur les soins et services de première ligne Université Laval, Québec, QC, Canada. <sup>9</sup>Department of Emergency Medicine, University of British Columbia, Vancouver, BC, Canada. <sup>10</sup>Département de psychologie, UQAM, Montréal, QC, Canada.

**CORRESPONDING AUTHOR:** Richard Fleet, Université Laval-CISSS Chaudière-Appalaches. 143 Rue Wolfe, Lévis, Québec, G6V 3Z1. Phone: (418) 717-7554. Email: richard.fleet@fmed.ulaval.ca

**WORD COUNT:** Abstract = 260 Manuscript = 2695

## ABSTRACT

**Objectives:** As Canada's second-largest province, the geography of Quebec poses unique challenges for the management of trauma patients. Our objectives were to examine mortality rates among trauma patients treated at rural emergency departments (EDs) and urban trauma centres across the province of Quebec, and to compare trauma care resources and services between these settings.

**Design:** Retrospective cohort study.

**Setting:** 26 rural EDs and 33 level 1 and 2 urban trauma centres in Quebec, Canada.

**Participants:** 79,957 trauma cases collected from Quebec's trauma registry.

**Primary and secondary outcome measures:** Our primary outcome of interest was mortality (prehospital, ED, in-hospital). We also compared the availability of services and staff specialties related to trauma care at rural and urban facilities. Multivariable generalized linear mixed models were used to determine the relationship between the primary facility and mortality.

**Results:** Overall, 7,215 (9.0%) trauma patients were treated in a rural ED and 72,742 (91.0%) received treatment at an urban centre. Mortality rates were higher in rural EDs compared to urban trauma centres (13.3% vs. 7.9%,  $p < 0.001$ ). After controlling for potential confounders, the odds of prehospital or ED mortality were over 3 times greater for patients treated in a rural ED (OR 3.44, 95% CI 1.88-6.28). Trauma care setting (rural vs urban) was not associated with in-hospital mortality. Nearly all of the specialized services evaluated were more present at urban trauma centres.

**Conclusions:** Trauma patients treated in rural EDs had a higher mortality rate and were more likely to die prehospital or in the ED compared to patients treated at an urban trauma centre.

**Keywords:** Rural; Urban; Trauma; Mortality; Resources.

### STRENGTHS AND LIMITATIONS OF THIS STUDY

- This is the first study to specifically compare trauma mortality and the availability of trauma-related resources at rural hospitals and urban trauma centres in Canada.
- This is a large retrospective cohort study of 79,957 trauma cases collected from Quebec's trauma registry over a 4-year study period.
- Our analyses included characteristics of trauma patients, their injuries, and the trauma care system to determine the independent association of these factors with mortality.
- Total prehospital times (not available in the current trauma registry) , trauma cases initially treated in remote outposts, and long-term functional outcomes were not specifically analyzed in this study.
- Our findings may not be generalizable to other jurisdictions due to differences in population, geography, resources, EMS systems, and the organizational structure of trauma care.

## INTRODUCTION

Trauma is the leading cause of death for Canadians under the age of 40 and the fifth leading cause of death for Canadians of all ages.[1] Although trauma care has improved dramatically since the implementation of organized trauma systems,[2-5] evidence suggests there are considerable differences in mortality between patients receiving care in rural and urban settings.[6-10] These differences may be attributable to longer transport times and limited availability of resources and services at rural hospitals.[11] Furthermore, prehospital mortality accounts for a large proportion of rural trauma deaths.[12]

Approximately 20% of Canadians live in rural areas.[13] Rural traumas commonly occur in the workplace (e.g., industry, mining, farming), during recreational activities (i.e., “higher-risk” outdoor sports), and on the roadways (e.g., poor driving conditions, impaired driving).[6,14] These patients generally receive treatment at rural emergency departments (EDs), which often have limited access to consultation services and advanced imaging. In addition, about 60% of rural hospitals are located greater than 150 km away from a level 1 or level 2 trauma centre, far exceeding the “golden hour” of trauma care.[15-18] Moreover, access to advanced paramedic care and air medevac capabilities is limited and varies from one provincial jurisdiction to another.[19,20]

Quebec is Canada’s second most populous province with 8 million inhabitants in 2016.[21] As Canada’s second largest province, there are geographical challenges in providing optimal trauma care to the population. The trauma system in Quebec was launched in 1993 and involves regionalized care from rural community hospitals through to urban level 1 trauma centres. We hypothesized that rural trauma victims in Quebec have worse outcomes compared to urban trauma patients, even in a modern trauma system. The primary objective of this study was

1  
2  
3 to examine mortality rates in trauma patients seen in rural EDs and urban trauma centres across  
4 the province. As a secondary objective, we compared the availability of trauma care resources  
5 and services at rural EDs and urban trauma centres in Quebec.  
6  
7  
8  
9  
10

## 11 **METHODS**

### 12 **Study design and data sources**

13  
14  
15 We performed a retrospective cohort study of all trauma cases in Quebec between 2009  
16 and 2013. The protocol for this study has been previously published.[22] Data were collected  
17 from the Quebec Trauma Registry Information System (BDM-SIRTQ), a population-based  
18 registry under the Ministry of Health and Social Services. The BDM-SIRTQ contains  
19 information on victims of unintentional traumatic injuries, victims who died on arrival at the ED  
20 or during ED stay, and victims who were hospitalized in a trauma centre in Quebec. Ethical  
21 approval was obtained from the CISSS Chaudière-Appalaches Research Ethics Committee  
22 (Project MP-2016-003). This study was performed in accordance with the Strengthening the  
23 Reporting of Observational Studies in Epidemiology (STROBE) guidelines for reporting  
24 observational studies.[23]  
25  
26  
27  
28  
29  
30  
31  
32  
33  
34  
35  
36  
37  
38  
39  
40  
41  
42

### 43 **Study definitions and inclusion criteria**

44 For the purposes of this study, all institutions designated by the Health Authority of  
45 Quebec as level 1 or level 2 trauma centres were considered urban centres.[24] Rural EDs were  
46 defined according to the following 4 criteria: 1) located in cities with a population of less than  
47 15,000 (2016 census data); 2) 24/7 physician coverage; 3) hospital with patient admission  
48  
49  
50  
51  
52  
53  
54  
55  
56  
57  
58  
59  
60

1  
2  
3 capability; and 4) located more than 50 minutes of ground transport from a level 1 or 2 trauma  
4  
5 centre. Ground transport times were estimated using Google Maps.[25]  
6

7  
8 All trauma cases occurring in Quebec during the study period and involving transport  
9  
10 directly to a rural ED or an urban trauma centre were eligible. Regarding patient transfers, only  
11  
12 trauma cases transferred from a rural ED to an urban trauma centre were included.  
13

### 14 15 16 17 **Data collection**

18  
19 Data were collected on patient demographics (age, sex), injury characteristics (Injury  
20  
21 Severity Score [ISS], mechanism, type, scene of injury), mode of transport (road ambulance vs  
22  
23 other types [e.g., air, personal vehicle]), transfer to an urban trauma centre, hospital admission,  
24  
25 and patient mortality (prehospital, ED, or in-hospital). Data on access to 24/7 in-hospital services  
26  
27 was obtained directly from hospitals in the context of a previous study,[26] and was updated by  
28  
29 phone calls to participating centres in March 2017. These services included access to intensive  
30  
31 care units (ICUs), laboratories, X-ray, computerized tomography (CT) scan, magnetic resonance  
32  
33 imaging (MRI) and ultrasound. We also collected data on the presence of specialities commonly  
34  
35 involved in trauma care (i.e., general and orthopedic surgery, internal medicine, neurology,  
36  
37 anesthesiology).  
38  
39  
40  
41  
42  
43  
44

### 45 **Statistical analysis**

46  
47 Descriptive statistics were used to analyze the characteristics of trauma cases, as well as  
48  
49 the types of services and specialities available at rural hospitals and urban centres. Means and  
50  
51 standard deviations are presented for continuous variables, and frequencies and proportions for  
52  
53 categorical variables. Variables with missing values are reported as such in the tables. We used  
54  
55  
56  
57  
58  
59  
60



1  
2  
3 student's t-tests and chi square analysis or Fisher's exact test, as appropriate, to test for  
4  
5 differences in characteristics between patients admitted to rural EDs and those transported  
6  
7 directly to an urban trauma centre. To determine the relationship between the primary facility  
8  
9 (rural ED vs. urban trauma centre) and mortality, bivariate and multivariable generalized linear  
10  
11 mixed models were performed and adjusted for the following variables: age, sex, ISS, injury  
12  
13 mechanism, penetrating injury, scene of injury, cranio-cerebral trauma, ambulance transport, and  
14  
15 transfer. Mortality was considered during the prehospital setting (dead on arrival to initial ED),  
16  
17 the ED setting (death during ED stay or during transfer from one ED to another) and the in-  
18  
19 hospital setting (death after ED discharge to any destination [e.g., hospital department,  
20  
21 rehabilitation]). Intraclass coefficient correlations (ICCs) were calculated to assess the  
22  
23 percentage of variance in the model explained by the primary facility. A sensitivity analysis was  
24  
25 performed for the subgroup of severe trauma cases ( $ISS \geq 15$ ). The same generalized linear  
26  
27 mixed model was used to explore the yearly variation in rural versus urban mortality by adding  
28  
29 an interaction term between primary facility and year. All analysis was performed using SAS  
30  
31 (version 9.4, Cary, NC).  
32  
33  
34  
35  
36  
37  
38  
39

## 40 **RESULTS**

41  
42 Fifty-nine hospitals met eligibility criteria and were included in the analysis; 26 were  
43  
44 rural EDs and 33 were urban trauma centres (Figure 1). Of the 26 rural EDs, 18 were primary  
45  
46 trauma centres (level 3), 6 were stabilization centres (level 4), and 2 were not designated trauma  
47  
48 centres by the Ministry of Health and Social Services.[24]  
49  
50  
51  
52  
53

### 54 **Hospital services and staff specialists**

55  
56  
57  
58  
59  
60

On average, rural EDs received 490,000 patient visits per year over the course of the study. Table 1 profiles the services and staff specialists in rural EDs and urban trauma centres in Quebec. Of the 26 rural EDs, 58% (15/26) were more than 150 km from an urban trauma centre. Services available at most rural hospitals included laboratory (100%; 26/26), basic x-ray (92%; 24/26), ICUs (77%, 20/26), bedside ultrasound (73%; 19/26) and CT scanners (69%; 18/26). Few rural EDs had ultrasound services for diagnostic imaging (31%; 8/26), and none had MRI services. While the majority of rural EDs had general surgeons (73%, 19/26) and anesthesiologists (65%; 17/26) on staff, fewer than half had an internal medicine specialist (38%; 10/26), only 12% (3/26) had an orthopedic surgeon, and none had a staff neurosurgeon. In comparison, all of the services and staff specialists examined were available at every urban trauma centre.

**Table 1. Characteristics of rural hospitals and urban trauma centres in Quebec, 2009-2013**

| Characteristic                                  | Rural EDs<br>N = 26 | Urban TCs<br>N = 33 | p value |
|-------------------------------------------------|---------------------|---------------------|---------|
| Distance from Level 1 or 2 trauma centre, n (%) |                     |                     |         |
| >150 km                                         | 15 (58)             | -                   | -       |
| ≤150 km                                         | 11 (42)             | -                   | -       |
| Types of services offered 24/7, n (%)           |                     |                     |         |
| Laboratory                                      | 26 (100)            | 33 (100)            | 1.00    |
| X-ray                                           | 24 (92)             | 33 (100)            | 0.19    |
| Intensive Care Unit                             | 20 (77)             | 33 (100)            | 0.005   |
| Portable ultrasound device (Bedside ED)         | 19 (73)             | 33 (100)            | 0.002   |
| Computerized Tomography Scan                    | 18 (69)             | 33 (100)            | <0.001  |
| Ultrasound (Radiology) <sup>1</sup>             | 8 (31)              | 33 (100)            | 0.001   |
| Magnetic Resonance Imaging                      | 0 (0)               | 33 (100)            | 0.001   |
| Types of specialists, n (%)                     |                     |                     |         |
| General surgeon                                 | 19 (73)             | 33 (100)            | 0.002   |
| Anesthesiologist                                | 17 (65)             | 33 (100)            | 0.002   |
| Internal medicine specialist                    | 10 (38)             | 33 (100)            | 0.001   |
| Orthopedic surgeon                              | 3 (12)              | 33 (100)            | 0.001   |
| Neurologist                                     | 0 (0)               | 33 (100)            | 0.001   |

ED = emergency department; TC = trauma centre.

<sup>1</sup>Available on weekdays.

### Profile of trauma cases

The 5-year cohort included 110,826 trauma cases in Quebec (Figure 2). Of these, a total of 30,869 cases were excluded from the analysis: 936 cases pertained to traumatic events occurring outside the province, 21,307 cases were treated at ineligible hospitals, and 8,626 cases involved patients who were transferred but not from a rural ED to an urban centre. The remaining 79,957 trauma cases were included, of which 72,742 (91.0%) were treated directly at level 1 or level 2 trauma centres and 7,215 (9.0%) were treated at rural EDs. Among patients taken to a rural ED, 3,827 (53%) were subsequently transferred to an urban centre.

Table 2 compares the characteristics of trauma cases at rural EDs and urban centres. Patients who received care at rural EDs were older than patients treated at urban trauma centres (mean age  $63.3 \pm 24.6$  years vs.  $59.1 \pm 26.3$  years,  $p < 0.001$ ). There were also older than patients who were transferred from rural EDs to urban centres (mean age  $63.3 \pm 24.6$  years vs.  $50.0 \pm 24.4$  years,  $p < 0.001$ ). Patients transferred from a rural facility to an urban trauma centre were more likely to be male than those who were treated at rural hospitals (61% vs. 48%,  $p < 0.001$ ). Overall, injury severity was similar between patients seen in rural EDs (median ISS 9 (IQR 4-9)) and urban trauma centres (median ISS 9 (IQR 4 -9)). Most trauma cases were low severity (88.4% of patients had an ISS  $< 15$ ). A greater proportion of patients with ISS  $> 25$  were treated at urban centres. Falls were the most common mechanism of injury in both settings. Urban trauma centres saw a greater proportion of fall-related traumas (69% vs. 66%,  $p < 0.001$ ), and a smaller proportion of traumas from motor vehicle collisions (15% vs. 19%,  $p < 0.001$ ). Injuries occurred most frequently to the limbs, followed by the head and thorax. Injury types were similar between patients treated at rural EDs and urban trauma centres.

**Table 2. Characteristics of trauma cases at rural hospitals and urban trauma centres**

| Characteristic                            | Rural EDs<br>N = 3388 | Transfers <sup>1</sup><br>N = 3827 | p value <sup>2</sup> | Urban TCs<br>N = 72742 | p value <sup>3</sup> |
|-------------------------------------------|-----------------------|------------------------------------|----------------------|------------------------|----------------------|
| <b>Demographics<sup>4</sup></b>           |                       |                                    |                      |                        |                      |
| Age, mean (SD)                            | 63.3 (24.6)           | 50.0 (24.4)                        | <0.001               | 59.1 (26.3)            | <0.001               |
| Male, n (%)                               | 1624 (48)             | 2322 (61)                          | <0.001               | 35031 (48)             | 0.80                 |
| <b>ISS, n (%)</b>                         |                       |                                    |                      |                        |                      |
| 0-14                                      | 3052 (90)             | 3188 (83)                          | <0.001               | 64450 (89)             | 0.008                |
| 15-24                                     | 227 (7)               | 312 (8)                            | 0.019                | 4659 (6)               | 0.49                 |
| 25-49                                     | 91 (3)                | 310 (8)                            | <0.001               | 3430 (5)               | <0.001               |
| ≥ 50                                      | 18 (<1)               | 17 (1)                             | 0.59                 | 203 (<1)               | 0.008                |
| <b>Injury mechanism, n (%)</b>            |                       |                                    |                      |                        |                      |
| Fall                                      | 2252 (66)             | 2113 (55)                          | <0.001               | 50462 (69)             | <0.001               |
| MVC                                       | 628 (19)              | 971 (25)                           | <0.001               | 10812 (15)             | <0.001               |
| Other                                     | 508 (15)              | 743 (20)                           | <0.001               | 11468 (16)             | 0.23                 |
| <b>Scene of injury, n (%)</b>             |                       |                                    |                      |                        |                      |
| Home                                      | 1616 (47)             | 645 (17)                           | <0.001               | 22550 (31)             | <0.001               |
| Street/road                               | 497 (15)              | 624 (16)                           | 0.06                 | 11908 (16)             | 0.009                |
| Other                                     | 1275 (38)             | 2558 (67)                          | <0.001               | 38284 (53)             | <0.001               |
| <b>Injury type,<sup>5</sup> n (%)</b>     |                       |                                    |                      |                        |                      |
| Head                                      | 643 (19)              | 661 (17)                           |                      | 12188 (17)             |                      |
| Face                                      | 321 (9)               | 534 (14)                           |                      | 9187 (13)              |                      |
| Neck                                      | 37 (1)                | 40 (1)                             |                      | 977 (1)                |                      |
| Thorax                                    | 709 (21)              | 430 (11)                           |                      | 10586 (15)             |                      |
| Abdominal                                 | 195 (6)               | 198 (5)                            |                      | 4260 (6)               |                      |
| Spinal                                    | 521 (15)              | 449 (12)                           |                      | 7906 (11)              |                      |
| Upper limb                                | 784 (23)              | 1182 (31)                          |                      | 21659 (30)             |                      |
| Lower limb                                | 1355 (40)             | 2069 (54)                          |                      | 40032 (55)             |                      |
| <b>Presence of cranio-cerebral trauma</b> |                       |                                    |                      |                        |                      |
| Undetermined                              | 345 (10)              | 437 (11)                           |                      | 7977 (11)              |                      |
| <b>Transport, n (%)</b>                   |                       |                                    |                      |                        |                      |
| Ambulance                                 | 2524 (74)             | 1749 (46)                          | <0.001               | 54745 (75)             | 0.32                 |
| Air                                       | 1 (<1)                | 5 (<1)                             | 0.2237               | 61 (<1)                | 0.984                |
| Other                                     | 424 (13)              | 252 (6)                            | <0.001               | 2757 (4)               | <0.001               |
| Unknown                                   | 439 (13)              | 1821 (48)                          | <0.001               | 15179 (21)             | <0.001               |

ED = emergency department; TC = trauma centre; SD = standard deviation; ISS = Injury Severity Score; MVC = motor vehicle collision.

<sup>1</sup>Patients transferred from rural EDs to urban trauma centres.

<sup>2</sup>Significance for difference in characteristics between trauma patients admitted to rural EDs and trauma patients transferred from rural EDs to urban centres.

<sup>3</sup>Significance for difference in characteristics between trauma patients admitted to rural EDs and trauma patients transported directly to urban centres.

<sup>4</sup>Data was unavailable for 258 patients.

<sup>5</sup>Some patients had >1 injury type.

## Trauma mortality

Overall mortality for patients seen in rural hospitals (i.e., not transferred) was 13.3% versus 7.9% for patients treated in urban level 1 and level 2 trauma centres ( $p < 0.001$ ).

Compared to either of these groups, patients who were initially assessed and stabilized in rural EDs and subsequently transferred to an urban centre for definitive care had significantly lower overall mortality (3.1%,  $p < 0.001$ ).

Table 3 shows crude and adjusted odds ratios for the association between mortality (prehospital or ED, in-hospital) and various patient-level and institution-level factors. The odds of death prehospital or in the ED was over 3 times greater for trauma patients treated in a rural ED (OR 3.44, 95% CI 1.88-6.28). Trauma care setting (rural vs urban) was not associated with

**Table 3. Regression analysis of the relationship between rural ED admission and trauma mortality**

| Variable                                      | Prehospital or ED mortality |                                      | In-hospital mortality |                                      |
|-----------------------------------------------|-----------------------------|--------------------------------------|-----------------------|--------------------------------------|
|                                               | Crude OR<br>(95% CI)        | Adjusted OR <sup>1</sup><br>(95% CI) | Crude OR<br>(95% CI)  | Adjusted OR <sup>1</sup><br>(95% CI) |
| Admitting facility (Ref: Urban trauma centre) |                             |                                      |                       |                                      |
| Rural ED                                      | 0.98 (0.63-1.54)            | 3.44 (1.88-6.28)                     | 0.77 (0.58-1.01)      | 0.92 (0.75-1.13)                     |
| Age (Ref: $\geq 65$ )                         |                             |                                      |                       |                                      |
| 0-15 years                                    | 0.97 (0.74-1.26)            | 0.74 (0.56-0.99)                     | 0.02 (0.01-0.04)      | 0.04 (0.02-0.07)                     |
| 16-64 years                                   | 5.46 (4.95-6.03)            | 1.96 (1.74-2.21)                     | 0.16 (0.14-0.17)      | 0.16 (0.14-0.18)                     |
| Male                                          | 3.65 (3.33-4.00)            | 1.90 (1.71-2.11)                     | 0.90 (0.84-0.96)      | 1.34 (1.25-1.45)                     |
| ISS (Ref: $\geq 50$ )                         |                             |                                      |                       |                                      |
| 0-14                                          | 0.03 (0.02-0.04)            | 0.08 (0.06-0.11)                     | 0.06 (0.04-0.08)      | 0.02 (0.01-0.03)                     |
| 15-24                                         | 0.05 (0.04-0.07)            | 0.08 (0.05-0.11)                     | 0.12 (0.08-0.17)      | 0.05 (0.03-0.07)                     |
| 25-49                                         | 0.18 (0.13-0.24)            | 0.23 (0.16-0.33)                     | 0.43 (0.30-0.62)      | 0.19 (0.13-0.28)                     |
| Injury mechanism (Ref: Other)                 |                             |                                      |                       |                                      |
| Fall                                          | 0.04 (0.03-0.04)            | 0.04 (0.03-0.05)                     | 2.81 (2.45-3.22)      | 1.17 (1.00-1.37)                     |
| MVC                                           | 0.63 (0.57-0.69)            | 0.45 (0.38-0.54)                     | 1.22 (1.02-1.45)      | 0.84 (0.67-1.06)                     |
| Penetrating injury (Ref: Any)                 |                             |                                      |                       |                                      |
| Lower/upper limbs                             | 1.09 (0.74-1.60)            | 0.34 (0.23-0.51)                     | 0.21 (0.10-0.42)      | 0.68 (0.33-1.38)                     |
| Thorax/abdomen/back                           | 11.24 (9.71-13.00)          | 1.75 (1.46-2.09)                     | 0.76 (0.56-1.04)      | 1.30 (0.91-1.86)                     |
| Scene of injury (Ref: Other)                  |                             |                                      |                       |                                      |
| Road/Street                                   | 5.10 (4.60-5.66)            | 1.81 (1.54-2.14)                     | 0.68 (0.60-0.77)      | 0.66 (0.56-0.79)                     |
| Domicile                                      | 2.86 (2.59-3.16)            | 4.11 (3.64-4.63)                     | 1.82 (1.70-1.96)      | 1.15 (1.07-1.25)                     |
| Cranio-cerebral trauma                        | 2.06 (1.86-2.29)            | 1.57 (1.38-1.79)                     | 2.53 (2.32-2.76)      | 1.19 (1.06-1.33)                     |
| Ambulance transport                           | 14.04 (10.94-18.03)         | 14.17 (10.89-18.43)                  | 7.15 (6.14-8.32)      | 4.20 (3.59-4.91)                     |
| Transfer                                      | 0.02 (0.01-0.04)            | 0.01 (0.01-0.02)                     | 0.61 (0.48-0.78)      | 0.97 (0.74-1.28)                     |

ED = emergency department; OR = odds ratio; CI = confidence interval; MVC = motor vehicle collision.

<sup>1</sup>Adjusted for age, sex, Injury Severity Score, injury mechanism, scene of injury, penetrating injury, cranio-cerebral trauma, ambulance transport and transfer.

Intraclass coefficient: 0.15 for prehospital or ED mortality, 0.06 for in-hospital mortality.

1  
2  
3 in-hospital mortality. Similar results were obtained following a sensitivity analysis limited to  
4 severe trauma cases ( $ISS \geq 15$ ) (Supplementary Material, Table 1).  
5  
6

7  
8 We compared adjusted mortality rate fluctuations between 2009 and 2013 for  
9 participating centres (Supplementary Material, Figure 1). Mortality in rural EDs over the five-  
10 year study period decreased by 3.74% versus 2.34% for urban trauma centres, but this difference  
11 was not significant ( $p = 0.18$ ). Despite decreased trauma mortality at both urban and rural  
12 hospitals, the gap in mortality between these two settings remained constant.  
13  
14  
15  
16  
17  
18  
19  
20

## 21 **DISCUSSION**

22  
23 This is the first study to describe and compare trauma cases presenting to rural EDs and  
24 urban centres in the province of Quebec. We found that overall mortality was greater for trauma  
25 patients seen in rural EDs (13.3% vs. 7.9%). After adjusting for potential confounders, the odds  
26 of prehospital or ED mortality were more than 3 times greater for trauma patients treated in rural  
27 EDs compared to urban trauma centres. Although mortality rates decreased at both rural and  
28 urban centres over the 5-year study period, the mortality gap between these settings remained  
29 constant. Roughly half of rural ED cases that survived the initial stabilization phase were  
30 transferred to an urban trauma centre; these patients had significantly lower mortality rates than  
31 non-transferred patients despite having greater injury severity. Compared to rural EDs, a larger  
32 proportion of urban centres offered all services (with the exception of laboratory and x-ray) and  
33 employed all types of staff specialists evaluated. Taken together, our findings demonstrate  
34 important differences in available care and outcomes for trauma patients in Quebec.  
35  
36  
37  
38  
39  
40  
41  
42  
43  
44  
45  
46  
47  
48  
49  
50

51 There are several limitations to this study. First, this was an analysis of data collected  
52 from a provincial trauma registry and thus subject to the inherent confines of retrospective  
53  
54  
55  
56  
57  
58  
59  
60

1  
2  
3 studies. Data for some of the variables assessed were incomplete. Additionally, the trauma  
4 registry does not capture the time interval from the 911 call to ambulance arrival at the scene  
5 which precluded our ability to calculate total prehospital times. Second, this study did not  
6 include trauma cases that were initially treated in remote outposts. Hence, our results may have  
7 minimized trauma mortality in areas that were more resource-limited, or isolated and vulnerable.  
8 Moreover, this study was not designed to compare long-term functional outcomes following  
9 trauma; this could be the focus of future studies. Finally, although this study was conducted in  
10 Canada's second-largest province, our findings may not be generalizable to other jurisdictions  
11 due to differences in population, geography, resources, EMS systems, and in the organizational  
12 structure of trauma care.  
13  
14  
15  
16  
17  
18  
19  
20  
21  
22  
23  
24  
25

26 Our observation that mortality rates were higher in trauma cases at rural EDs is consistent  
27 with previous studies.[6,7,27,28] Indeed, higher mortality rates in the prehospital phase of care  
28 have been reported in the literature for more than 20 years.[7,29] In a population-based analysis  
29 of all trauma deaths in the province of Ontario, Gomez et al. found that over half of rural trauma  
30 deaths occurred in the prehospital setting.[28] Furthermore, among trauma patients that survived  
31 long enough to reach hospital, the risk of ED mortality was 3 times greater for patients injured in  
32 areas with limited access to trauma centre care. In another study of trauma patients served by  
33 emergency medical services (EMS) in rural and urban counties in Oregon and Washington,  
34 Newgard et al. found that half of rural trauma deaths occurred prehospital, and that 90% of rural  
35 deaths took place within 24 hours of injury (compared to 64% of urban deaths).[12] Although  
36 overall mortality rates did not differ between rural and urban regions, the authors suggested that  
37 the lack of a statistically significant difference may reflect a rural sample size that was  
38 underpowered to detect such a difference. It has been noted that the overall prehospital period in  
39  
40  
41  
42  
43  
44  
45  
46  
47  
48  
49  
50  
51  
52  
53  
54  
55  
56  
57  
58  
59  
60

1  
2  
3 the United States is almost one third longer in rural settings compared to urban  
4  
5 environments.[30] Several studies conducted in Quebec suggest there is an association between  
6  
7 total prehospital time and mortality in seriously injured patients, which is consistent with the  
8  
9 concept of the “golden hour” in trauma.[31,32] Although time to definitive care is a major  
10  
11 determinant of trauma outcomes, assessing this relationship across a field-defined population of  
12  
13 injured persons using EMS intervals has generally produced inconclusive results.[12]  
14  
15 Furthermore, testing the hypothesis that shorter EMS intervals improve outcomes requires  
16  
17 rigorous study designs that are often impracticable.  
18  
19

20  
21 This study is part of a larger project aimed at finding solutions to improve rural trauma  
22  
23 and emergency care in Quebec.[22] A Delphi phase to this project is currently underway, as well  
24  
25 as a large-scale qualitative study that mobilizes multiple stakeholders (citizens, decision makers,  
26  
27 health care professionals) to participate in efforts to improve rural emergency care.[37] Potential  
28  
29 solutions currently being explored include improving databases to better capture EMS  
30  
31 intervals,[22] piloting the implementation of a helicopter EMS system,[33] incorporating  
32  
33 telehealth in the prehospital and rural ED settings,[34,35] and deploying mobile trauma  
34  
35 simulation training programs in rural EDs.[36] These solutions could be deployed in rural areas,  
36  
37 that are most at risk for trauma mortality.  
38  
39  
40  
41  
42  
43

## 44 CONCLUSIONS

45  
46 The results of this study illustrate significant differences in mortality and resource  
47  
48 availability at rural hospitals and urban trauma centres in Quebec. The likelihood of mortality  
49  
50 was over 3 times higher for patients treated at rural EDs versus urban trauma centres. While  
51  
52 mortality rates decreased at both rural and urban facilities over the study period, the gap in  
53  
54  
55  
56  
57  
58  
59  
60



1  
2  
3 mortality between these settings remained constant; this is a finding of concern in a universal  
4 health care system. Solutions to improve trauma care in Quebec are currently being explored and  
5  
6 deployed.  
7  
8  
9

## 10 11 12 **CONTRIBUTORS**

13  
14  
15 RF, JP, MO, JPF, FLau and GD conceived the study, designed the protocol, and obtained  
16 research funding. RF and CTP performed the literature search. RF, FKT, and ST supervised data  
17 collection. RF, FLau and ST provided statistical advice on study design and analyzed the data.  
18  
19 All authors contributed to interpreting the data and drafting the manuscript. All authors critically  
20 reviewed the manuscript for important intellectual content, approved the final version of the  
21 submitted manuscript, and agree to be accountable for all aspects of the work.  
22  
23  
24  
25  
26  
27  
28  
29  
30  
31

## 32 **ACKNOWLEDGEMENTS**

33  
34 The authors thank Percipient Research & Consulting for assisting with language editing.  
35  
36  
37

## 38 **FUNDING**

39  
40 This work was supported by the Fonds de Recherche en Santé du Québec (FRSQ) -  
41 Consortium pour le développement de la recherche en traumatologie 2015-2018.  
42  
43  
44  
45  
46  
47

## 48 **COMPETING INTERESTS**

49  
50 None declared.  
51  
52  
53  
54  
55  
56  
57  
58  
59  
60

1  
2  
3 **PATIENT CONSENT**  
4

5 Not required.  
6  
7  
8  
9

10 **ETHICS APPROVAL**  
11

12 This study was approved by the CISSS Chaudière-Appalaches Research Ethics  
13 Committee (Project MP-2016-003).  
14  
15  
16  
17  
18

19 **DATA SHARING STATEMENT**  
20

21 No additional data available.  
22  
23  
24  
25  
26  
27  
28  
29  
30  
31  
32  
33  
34  
35  
36  
37  
38  
39  
40  
41  
42  
43  
44  
45  
46  
47  
48  
49  
50  
51  
52  
53  
54  
55  
56  
57  
58  
59  
60

## REFERENCES

1. Statistics Canada. Table 13-10-0394-01 Leading causes of death, total population, by age group. Available from: <https://www150.statcan.gc.ca/t1/tb11/en/tv.action?pid=1310039401> (Accessed July 12 2018).
2. Kuimi BLB, Moore L, Cissé B, et al. Influence of access to an integrated trauma system on in-hospital mortality and length of stay. *Injury* 2015;46:1257-61.
3. Moore L, Champion H, Tardif P-A, et al. Impact of trauma system structure on injury outcomes: a systematic review and meta-analysis. *World J Surg* 2018;42:1327-39.
4. MacKenzie EJ, Rivara FP, Jurkovich GJ, et al. The national study on costs and outcomes of trauma. *J Trauma* 2007;63:S54-67, S81-6.
5. Moore L, Turgeon AF, Lauzier F, et al. Evolution of patient outcomes over 14 years in a mature, inclusive Canadian trauma system. *World J Surg* 2015;39:1397-405.
6. Peek-Asa C, Zwerling C, Stallones L. Acute traumatic injuries in rural populations. *Am J Public Health* 2004;94:1689-93.
7. Mitchell RJ, Chong S. Comparison of injury-related hospitalised morbidity and mortality in urban and rural areas in Australia. *Rural Remote Health* 2010;10:1326.
8. Kim K, Ozegovic D, Voaklander DC. Differences in incidence of injury between rural and urban children in Canada and the USA: a systematic review. *Inj Prev* 2012;18:264-71.
9. Pampalon R, Martinez J, Hamel D. Does living in rural areas make a difference for health in Quebec? *Health Place* 2006;12:421-35.
10. Lagacé C, Desmeules M, Pong RW, et al. Non-communicable disease and injury-related mortality in rural and urban places of residence: a comparison between Canada and Australia. *Can J Public Health* 2007;98:S62-9.

11. Jarman MP, Castillo RC, Carlini AR, et al. Rural risk: geographic disparities in trauma mortality. *Surgery* 2016;160:1551-9.
12. Newgard CD, Fu R, Bulger E, et al. Evaluation of rural vs urban trauma patients served by 9-1-1 emergency medical services. *JAMA Surg* 2017;152:11-8.
13. Statistics Canada. Table 17-10-0118-01 Selected population characteristics, Canada, provinces and territories. Available from: <https://www150.statcan.gc.ca/t1/tb11/en/tv.action?pid=1710011801> (Accessed August 5 2018).
14. Garcia MC, Faul M, Massetti G, et al. Reducing potentially excess deaths from the five leading causes of death in the rural United States. *MMWR Surveill Summ* 2017;66:1-7.
15. Fleet R, Audette LD, Marcoux J, et al. Comparison of access to services in rural emergency departments in Quebec and British Columbia. *CJEM* 2014;16:437-48.
16. Fleet R, Pelletier C, Marcoux J, et al. Differences in access to services in rural emergency departments of Quebec and Ontario. *PLoS One* 2015;10:e0123746.
17. Fleet R, Poitras J, Maltais-Giguere J, et al. A descriptive study of access to services in a random sample of Canadian rural emergency departments. *BMJ Open* 2013;3:e003876.
18. Bergeron C, Fleet R, Tounkara FK, et al. Lack of CT scanner in a rural emergency department increases inter-facility transfers: a pilot study. *BMC Res Notes* 2017;10:772.
19. Nolan B, Tien H, Sawadsky B, et al. Comparison of helicopter emergency medical services transport types and delays on patient outcomes at two level I trauma centers. *Prehosp Emerg Care* 2017;21:327-33.
20. Dalton M. Quebec's lack of emergency air ambulance system 'embarrassing,' renowned doctor says. CBC News. Available from: <https://www.cbc.ca/news/canada/montreal/quebec-air-ambulance-david-mulder-1.4614451> (Accessed June 12 2018).

- 1  
2  
3 21. Statistics Canada. Census profile, 2016 census. Available from:  
4  
5 <http://www12.statcan.gc.ca/census-recensement/2016/dp-pd/prof/index.cfm?Lang=E> (Accessed  
6  
7 June 8 2018).  
8  
9
- 10 22. Fleet R, Tounkara FK, Ouimet M, et al. Portrait of trauma care in Quebec's rural emergency  
11  
12 departments and identification of priority intervention needs to improve the quality of care: a  
13  
14 study protocol. *BMJ Open* 2016;6:e010900.  
15
- 16 23. Von Elm E, Altman DG, Egger M, et al. Strengthening the Reporting of Observational  
17  
18 Studies in Epidemiology (STROBE) statement: guidelines for reporting observational studies.  
19  
20 *BMJ* 2007;335:806-8.  
21  
22
- 23 24. Ministère de la santé et des services sociaux. Cadre normatif du Système d'information du  
24  
25 Registre des traumatismes du Québec - Annexe 13 Liste des installations désignées. Available  
26  
27 from: [http://publications.msss.gouv.qc.ca/msss/document-](http://publications.msss.gouv.qc.ca/msss/document-001684/?&txt=registre&msss_valpub&date=DESC&titre=ASC)  
28  
29 [001684/?&txt=registre&msss\\_valpub&date=DESC&titre=ASC](http://publications.msss.gouv.qc.ca/msss/document-001684/?&txt=registre&msss_valpub&date=DESC&titre=ASC) (Accessed June 8 2018).  
30  
31  
32
- 33 25. Wallace DJ, Kahn JM, Angus DC, et al. Accuracy of prehospital transport time estimation.  
34  
35 *Acad Emerg Med* 2014;21:9-16.  
36
- 37 26. Fleet R, Poitras J, Archambault P, et al. Portrait of rural emergency departments in Québec  
38  
39 and utilization of the provincial emergency department management guide: cross sectional  
40  
41 survey. *BMC Health Serv Res* 2015;15:572.  
42  
43
- 44 27. Fatovich DM, Phillips M, Langford SA, et al. A comparison of metropolitan vs rural major  
45  
46 trauma in Western Australia. *Resuscitation* 2011;82:886-90.  
47  
48
- 49 28. Gomez D, Berube M, Xiong W, et al. Identifying targets for potential interventions to reduce  
50  
51 rural trauma deaths: a population-based analysis. *J Trauma* 2010;69:633-9.  
52  
53  
54  
55  
56  
57  
58  
59  
60

- 1  
2  
3 29. Rogers FB, Shackford SR, Hoyt DB, et al. Trauma deaths in a mature urban vs rural trauma  
4 system: a comparison. *Arch Surg* 1997;132:376-82.  
5  
6  
7 30. Carr BG, Caplan JM, Pryor JP, et al. A meta-analysis of prehospital care times for trauma.  
8  
9 *Prehosp Emerg Care* 2006;10:198-206.  
10  
11 31. Sampalis JS, Denis R, Lavoie A, et al. Trauma care regionalization: a process-outcome  
12 evaluation. *J Trauma* 1999;46:565-81.  
13  
14 32. Sampalis JS, Lavoie A, Williams J, et al. Impact of on-site care, prehospital time, and level  
15 of in-hospital care on survival in severely injured patients. *J Trauma* 1993;34:252-61.  
16  
17 33. Touzin C. Transport de patients par hélicoptère: Québec lance un projet pilote. La Presse.  
18 Available from: [https://www.lapresse.ca/actualites/sante/201806/21/01-5186809-transport-de-](https://www.lapresse.ca/actualites/sante/201806/21/01-5186809-transport-de-patients-par-helicoptere-quebec-lance-un-projet-pilote.php)  
19 patients-par-helicoptere-quebec-lance-un-projet-pilote.php (Accessed July 18 2018).  
20  
21 34. Amadi-Obi A, Gilligan P, Owens N, et al. Telemedicine in pre-hospital care: a review of  
22 telemedicine applications in the pre-hospital environment. *Int J Emerg Med* 2014;7:29.  
23  
24 35. Duchesne JC, Kyle A, Simmons J, et al. Impact of telemedicine upon rural trauma care. *J*  
25 *Trauma* 2008;64:92-8.  
26  
27 36. Martin D, Bekiaris B, Hansen G. Mobile emergency simulation training for rural health  
28 providers. *Rural Remote Health* 2017;17:4057.  
29  
30 37. Fleet R, Dupuis G, Fortin J-P, et al. Rural emergency care 360°: mobilising healthcare  
31 professionals, decision-makers, patients and citizens to improve rural emergency care in the  
32 province of Quebec, Canada: a qualitative study protocol. *BMJ Open* 2017;7:e016039.  
33  
34  
35  
36  
37  
38  
39  
40  
41  
42  
43  
44  
45  
46  
47  
48  
49  
50  
51  
52  
53  
54  
55  
56  
57  
58  
59  
60

1  
2  
3 **FIGURE LEGENDS**  
4  
5  
6  
7

8 **Figure 1. Map of rural emergency departments and Level 1 and 2 trauma centres included**  
9 **in the study**  
10  
11

12  
13  
14 **Figure 2. Flow chart of trauma cases seen in rural emergency departments and urban**  
15 **trauma centres in Quebec between 2009 and 2013. ED = emergency department; TC =**  
16 **trauma centre**  
17  
18  
19  
20  
21  
22  
23  
24  
25  
26  
27  
28  
29  
30  
31  
32  
33  
34  
35  
36  
37  
38  
39  
40  
41  
42  
43  
44  
45  
46  
47  
48  
49  
50  
51  
52  
53  
54  
55  
56  
57  
58  
59  
60

1  
2  
3 **SUPPLEMENTARY MATERIALS**  
4  
5  
6  
7

8 **Supplementary Table 1. Sensitivity analysis of the relationship between rural ED**  
9  
10 **admission and trauma mortality**  
11  
12

13  
14 **Supplementary Figure 1. Trends in trauma mortality at rural emergency departments and**  
15 **urban trauma centres in Quebec, 2009-2013.**  
16  
17  
18  
19  
20  
21  
22  
23  
24  
25  
26  
27  
28  
29  
30  
31  
32  
33  
34  
35  
36  
37  
38  
39  
40  
41  
42  
43  
44  
45  
46  
47  
48  
49  
50  
51  
52  
53  
54  
55  
56  
57  
58  
59  
60



1  
2  
3  
4  
5  
6  
7  
8  
9  
10  
11  
12  
13  
14  
15  
16  
17  
18  
19  
20  
21  
22  
23  
24  
25  
26  
27  
28  
29  
30  
31

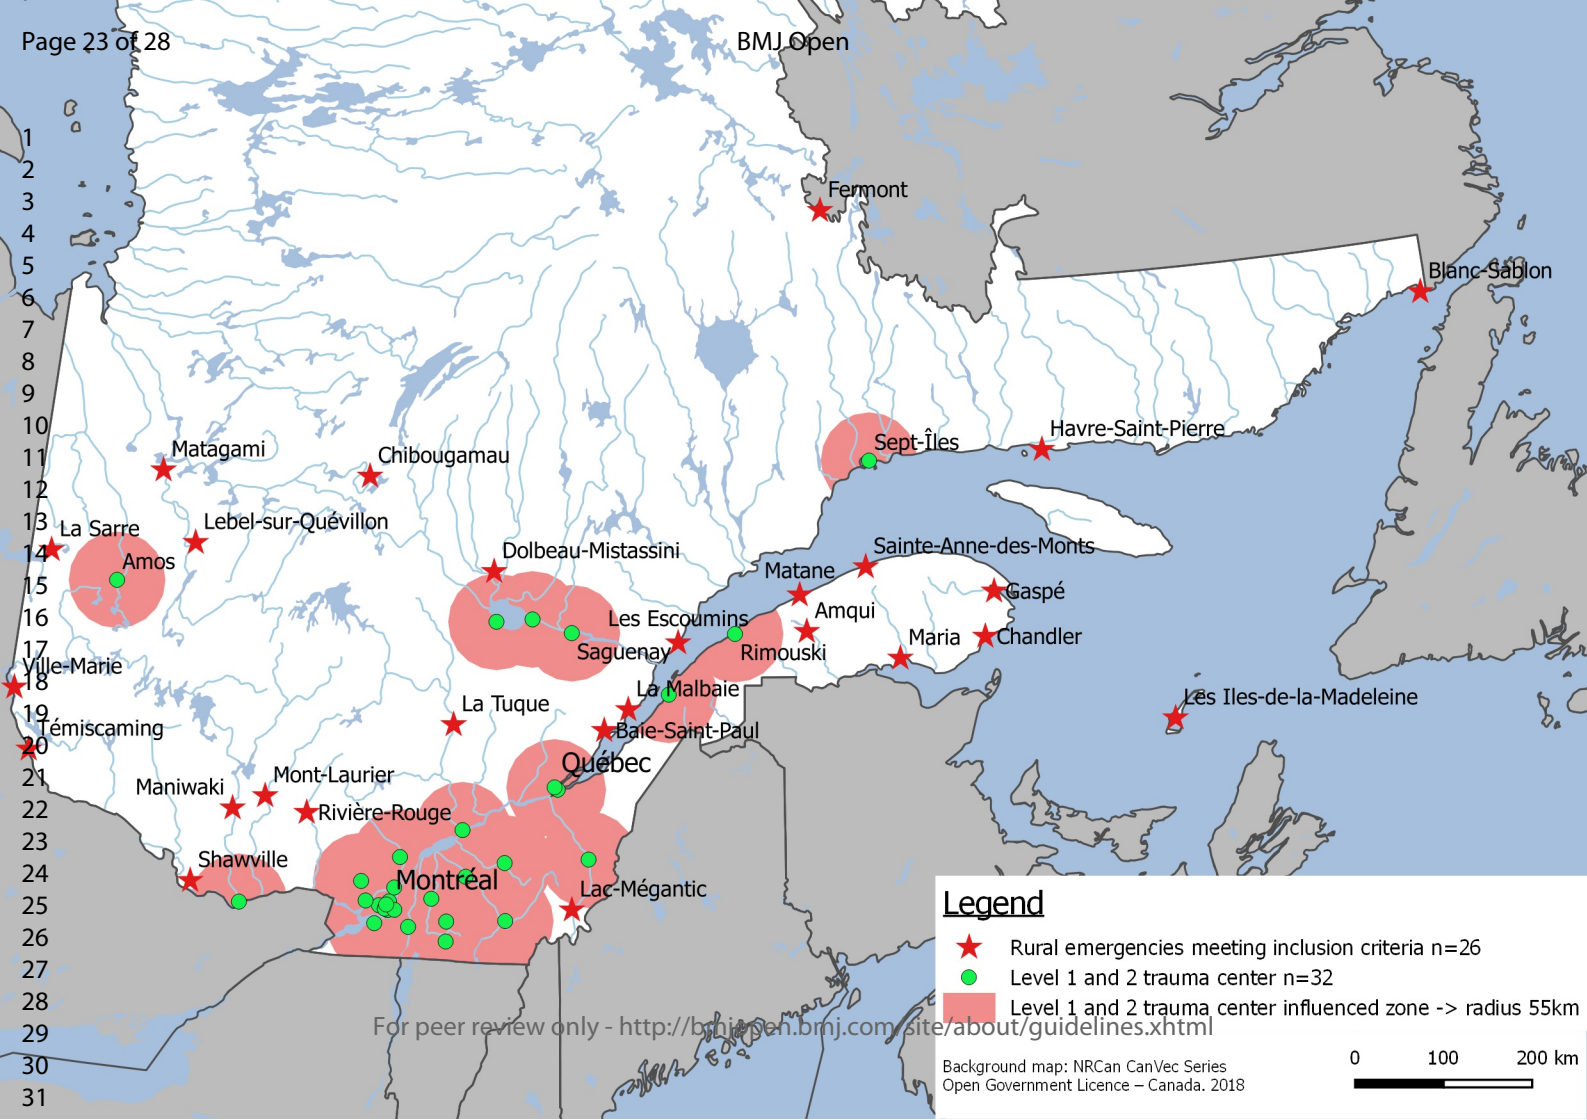

**Legend**

- ★ Rural emergencies meeting inclusion criteria n=26
- Level 1 and 2 trauma center n=32
- Level 1 and 2 trauma center influenced zone -> radius 55km

For peer review only - <http://bmjopen.bmj.com/site/about/guidelines.xhtml>

Background map: NRCan CanVec Series  
Open Government Licence – Canada, 2018

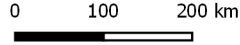

1  
2  
3  
4  
5  
6  
7  
8  
9  
10  
11  
12  
13  
14  
15  
16  
17  
18

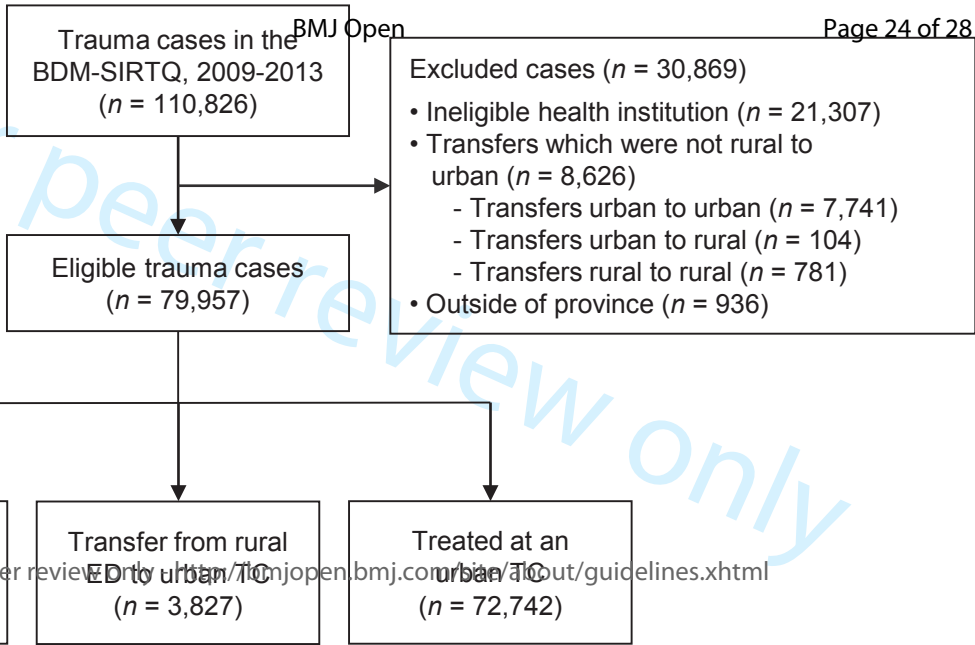

**Supplementary Table 1. Sensitivity analysis of the relationship between rural ED admission and trauma mortality**

| Variable                                      | Prehospital or ED mortality,<br>Adjusted OR <sup>1</sup> (95% CI) | In-hospital mortality,<br>Adjusted OR <sup>1</sup> (95% CI) |
|-----------------------------------------------|-------------------------------------------------------------------|-------------------------------------------------------------|
| Admitting facility (Ref: Urban trauma centre) |                                                                   |                                                             |
| Rural ED                                      | 4.46 (2.20-9.05)                                                  | 1.25 (0.81-1.93)                                            |
| Age (Ref: ≥ 65)                               |                                                                   |                                                             |
| 0-15 years                                    | 1.12 (0.61-2.08)                                                  | 0.15 (0.08-0.29)                                            |
| 16-64 years                                   | 1.00 (0.80-1.25)                                                  | 0.25 (0.21-0.29)                                            |
| Male                                          | 1.15 (0.94-1.41)                                                  | 0.99 (0.85-1.15)                                            |
| ISS (Ref: ≥ 50)                               |                                                                   |                                                             |
| 15-24                                         | 0.05 (0.03-0.07)                                                  | 0.07 (0.05-0.10)                                            |
| 25-49                                         | 0.19 (0.13-0.27)                                                  | 0.26 (0.18-0.39)                                            |
| Injury mechanism (Ref: Other)                 |                                                                   |                                                             |
| Fall                                          | 0.18 (0.13-0.24)                                                  | 0.92 (0.70-1.21)                                            |
| MVC                                           | 0.40 (0.28-0.57)                                                  | 0.64 (0.45-0.91)                                            |
| Penetrating injury (Ref: Any)                 |                                                                   |                                                             |
| Lower/upper limbs                             | 3.51 (1.31-9.42)                                                  | 2.63 (0.69-9.98)                                            |
| Thorax/abdomen/back                           | 3.64 (2.67-4.98)                                                  | 1.13 (0.70-1.82)                                            |
| Scene of injury (Ref: Other)                  |                                                                   |                                                             |
| Road/street                                   | 1.46 (1.07-1.99)                                                  | 1.04 (0.80-1.35)                                            |
| Domicile                                      | 1.56 (1.22-1.99)                                                  | 1.43 (1.21-1.69)                                            |
| Cranio-cerebral trauma                        | 0.96 (0.79-1.17)                                                  | 1.28 (1.11-1.48)                                            |
| Ambulance transport                           | 4.14 (2.50-6.83)                                                  | 4.94 (3.48-7.03)                                            |
| Transfer                                      | 0.01 (0.00-0.02)                                                  | 0.80 (0.49-1.33)                                            |

ED, emergency department; OR, odds ratio; CI, confidence interval; MVC, motor vehicle collision.  
<sup>1</sup>Adjusted for age, sex, Injury Severity Score, injury mechanism, scene of injury, penetrating injury, cranio-cerebral trauma, ambulance transport and transfer.

1  
2  
3  
4  
5  
6  
7  
8  
9  
10  
11  
12  
13  
14  
15  
16  
17  
18  
19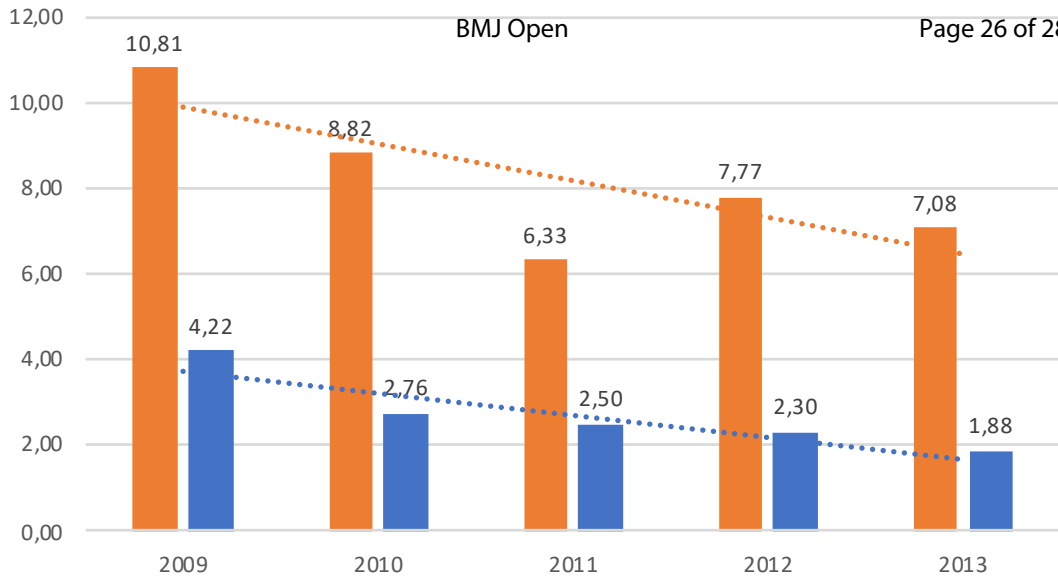

For peer review only - <http://bmjopen.bmj.com/site/about/guidelines.xhtml>

■ Rural ■ Urban ..... Linéaire (Rural) ..... Linéaire (Urban)

STROBE Statement—Checklist of items that should be included in reports of *cohort studies*

|                              | Item No | Recommendation                                                                                                                                                                                                              |
|------------------------------|---------|-----------------------------------------------------------------------------------------------------------------------------------------------------------------------------------------------------------------------------|
| <b>Title and abstract</b>    | 1       | (a) Indicate the study's design with a commonly used term in the title or the abstract – <b>Page 1</b>                                                                                                                      |
|                              |         | (b) Provide in the abstract an informative and balanced summary of what was done and what was found – <b>Page 2</b>                                                                                                         |
| <b>Introduction</b>          |         |                                                                                                                                                                                                                             |
| Background/rationale         | 2       | Explain the scientific background and rationale for the investigation being reported – <b>Page 4</b>                                                                                                                        |
| Objectives                   | 3       | State specific objectives, including any prespecified hypotheses – <b>Pages 4, 5</b>                                                                                                                                        |
| <b>Methods</b>               |         |                                                                                                                                                                                                                             |
| Study design                 | 4       | Present key elements of study design early in the paper – <b>Page 5</b>                                                                                                                                                     |
| Setting                      | 5       | Describe the setting, locations, and relevant dates, including periods of recruitment, exposure, follow-up, and data collection – <b>Pages 5, 6</b>                                                                         |
| Participants                 | 6       | (a) Give the eligibility criteria, and the sources and methods of selection of participants. Describe methods of follow-up – <b>Pages 5, 6</b>                                                                              |
|                              |         | (b) For matched studies, give matching criteria and number of exposed and unexposed – <b>n/a</b>                                                                                                                            |
| Variables                    | 7       | Clearly define all outcomes, exposures, predictors, potential confounders, and effect modifiers. Give diagnostic criteria, if applicable – <b>Pages 6, 7</b>                                                                |
| Data sources/<br>measurement | 8*      | For each variable of interest, give sources of data and details of methods of assessment (measurement). Describe comparability of assessment methods if there is more than one group – <b>Pages 5, 6</b>                    |
| Bias                         | 9       | Describe any efforts to address potential sources of bias – <b>Page 7</b>                                                                                                                                                   |
| Study size                   | 10      | Explain how the study size was arrived at – <b>Page 5</b>                                                                                                                                                                   |
| Quantitative variables       | 11      | Explain how quantitative variables were handled in the analyses. If applicable, describe which groupings were chosen and why – <b>Pages 6, 7</b>                                                                            |
| Statistical methods          | 12      | (a) Describe all statistical methods, including those used to control for confounding – <b>Pages 6, 7</b>                                                                                                                   |
|                              |         | (b) Describe any methods used to examine subgroups and interactions – <b>n/a</b>                                                                                                                                            |
|                              |         | (c) Explain how missing data were addressed – <b>Page 6</b>                                                                                                                                                                 |
|                              |         | (d) If applicable, explain how loss to follow-up was addressed – <b>n/a</b>                                                                                                                                                 |
|                              |         | (e) Describe any sensitivity analyses – <b>Page 7</b>                                                                                                                                                                       |
| <b>Results</b>               |         |                                                                                                                                                                                                                             |
| Participants                 | 13*     | (a) Report numbers of individuals at each stage of study—eg numbers potentially eligible, examined for eligibility, confirmed eligible, included in the study, completing follow-up, and analysed – <b>Page 8; Figure 2</b> |
|                              |         | (b) Give reasons for non-participation at each stage – <b>Figure 2</b>                                                                                                                                                      |
|                              |         | (c) Consider use of a flow diagram – <b>Figure 2</b>                                                                                                                                                                        |
| Descriptive data             | 14*     | (a) Give characteristics of study participants (eg demographic, clinical, social) and information on exposures and potential confounders – <b>Pages 9, 10; Table 2</b>                                                      |
|                              |         | (b) Indicate number of participants with missing data for each variable of interest – <b>Table 2</b>                                                                                                                        |
|                              |         | (c) Summarise follow-up time (eg, average and total amount) – <b>n/a</b>                                                                                                                                                    |
| Outcome data                 | 15*     | Report numbers of outcome events or summary measures over time – <b>Pages 10, 11</b>                                                                                                                                        |
| Main results                 | 16      | (a) Give unadjusted estimates and, if applicable, confounder-adjusted estimates and their precision (eg, 95% confidence interval). Make clear which confounders were                                                        |

|                          |    |                                                                                                                                                                                                  |
|--------------------------|----|--------------------------------------------------------------------------------------------------------------------------------------------------------------------------------------------------|
|                          |    | adjusted for and why they were included – <b>Pages 10, 11</b>                                                                                                                                    |
|                          |    | (b) Report category boundaries when continuous variables were categorized – <b>Table 3</b>                                                                                                       |
|                          |    | (c) If relevant, consider translating estimates of relative risk into absolute risk for a meaningful time period – <b>n/a</b>                                                                    |
| Other analyses           | 17 | Report other analyses done—eg analyses of subgroups and interactions, and sensitivity analyses – <b>Supplemental Material, Table 1</b>                                                           |
| <b>Discussion</b>        |    |                                                                                                                                                                                                  |
| Key results              | 18 | Summarise key results with reference to study objectives – <b>Page 12</b>                                                                                                                        |
| Limitations              | 19 | Discuss limitations of the study, taking into account sources of potential bias or imprecision. Discuss both direction and magnitude of any potential bias – <b>Pages 12, 13</b>                 |
| Interpretation           | 20 | Give a cautious overall interpretation of results considering objectives, limitations, multiplicity of analyses, results from similar studies, and other relevant evidence – <b>Pages 13, 14</b> |
| Generalisability         | 21 | Discuss the generalisability (external validity) of the study results – <b>Page 13</b>                                                                                                           |
| <b>Other information</b> |    |                                                                                                                                                                                                  |
| Funding                  | 22 | Give the source of funding and the role of the funders for the present study and, if applicable, for the original study on which the present article is based – <b>Page 15</b>                   |

\*Give information separately for exposed and unexposed groups.

**Note:** An Explanation and Elaboration article discusses each checklist item and gives methodological background and published examples of transparent reporting. The STROBE checklist is best used in conjunction with this article (freely available on the Web sites of PLoS Medicine at <http://www.plosmedicine.org/>, Annals of Internal Medicine at <http://www.annals.org/>, and Epidemiology at <http://www.epidem.com/>). Information on the STROBE Initiative is available at <http://www.strobe-statement.org>.

# BMJ Open

## Profile of trauma mortality and trauma care resources at rural emergency departments and urban trauma centres in Quebec: a population-based retrospective cohort study

|                                 |                                                                                                                                                                                                                                                                                                                                                                                                                                                                                                                                                                                                                                                                                                                                                                                                                                                                                                                                                                                                                                                                                                                                                                                                                                                                                                                                                        |
|---------------------------------|--------------------------------------------------------------------------------------------------------------------------------------------------------------------------------------------------------------------------------------------------------------------------------------------------------------------------------------------------------------------------------------------------------------------------------------------------------------------------------------------------------------------------------------------------------------------------------------------------------------------------------------------------------------------------------------------------------------------------------------------------------------------------------------------------------------------------------------------------------------------------------------------------------------------------------------------------------------------------------------------------------------------------------------------------------------------------------------------------------------------------------------------------------------------------------------------------------------------------------------------------------------------------------------------------------------------------------------------------------|
| Journal:                        | <i>BMJ Open</i>                                                                                                                                                                                                                                                                                                                                                                                                                                                                                                                                                                                                                                                                                                                                                                                                                                                                                                                                                                                                                                                                                                                                                                                                                                                                                                                                        |
| Manuscript ID                   | bmjopen-2018-028512.R1                                                                                                                                                                                                                                                                                                                                                                                                                                                                                                                                                                                                                                                                                                                                                                                                                                                                                                                                                                                                                                                                                                                                                                                                                                                                                                                                 |
| Article Type:                   | Research                                                                                                                                                                                                                                                                                                                                                                                                                                                                                                                                                                                                                                                                                                                                                                                                                                                                                                                                                                                                                                                                                                                                                                                                                                                                                                                                               |
| Date Submitted by the Author:   | 29-Mar-2019                                                                                                                                                                                                                                                                                                                                                                                                                                                                                                                                                                                                                                                                                                                                                                                                                                                                                                                                                                                                                                                                                                                                                                                                                                                                                                                                            |
| Complete List of Authors:       | <p>Fleet, Richard; Université Laval, Médecine familiale et médecine d'urgence; Chaire de recherche en médecine d'urgence ULaval - CISSS Chaudière-Appalaches, Centre de recherche du CISSS Chaudière-Appalaches</p> <p>Lauzier, François; Centre de Recherche du CHU de Québec - Université Laval, Population Health and Optimal Health Practices Research Unit (Trauma - Emergency - Critical Care Medicine); Université Laval, Department of Anesthesiology and Critical Care Medicine</p> <p>Toukara, Fatoumata; Chaire de recherche en médecine d'urgence ULaval - CISSS Chaudière-Appalaches, Centre de recherche du CISSS Chaudière-Appalaches</p> <p>Turcotte, Stéphane; Centre de recherche du CISSS Chaudière-Appalaches</p> <p>Poitras, Julien; Université Laval,</p> <p>Morris, Judy; HSCM, Emergency Medicine</p> <p>Ouimet, Mathieu; Université Laval, Sciences politiques</p> <p>Fortin, Jean-Paul; Centre intégré universitaire de santé et de services sociaux de la Capitale-Nationale</p> <p>Plant, Jeff; University of British Columbia</p> <p>Légaré, France; Université Laval, Médecine familiale</p> <p>Dupuis, Gilles; Université du Québec à Montréal,</p> <p>Turgeon-Pelchat, Catherine; Chaire de recherche en médecine d'urgence ULaval - CISSS Chaudière-Appalaches, Centre de recherche du CISSS Chaudière-Appalaches</p> |
| <b>Primary Subject Heading</b>: | Emergency medicine                                                                                                                                                                                                                                                                                                                                                                                                                                                                                                                                                                                                                                                                                                                                                                                                                                                                                                                                                                                                                                                                                                                                                                                                                                                                                                                                     |
| Secondary Subject Heading:      | Intensive care                                                                                                                                                                                                                                                                                                                                                                                                                                                                                                                                                                                                                                                                                                                                                                                                                                                                                                                                                                                                                                                                                                                                                                                                                                                                                                                                         |
| Keywords:                       | ACCIDENT & EMERGENCY MEDICINE, Organisation of health services < HEALTH SERVICES ADMINISTRATION & MANAGEMENT, INTENSIVE & CRITICAL CARE, TRAUMA MANAGEMENT                                                                                                                                                                                                                                                                                                                                                                                                                                                                                                                                                                                                                                                                                                                                                                                                                                                                                                                                                                                                                                                                                                                                                                                             |
|                                 |                                                                                                                                                                                                                                                                                                                                                                                                                                                                                                                                                                                                                                                                                                                                                                                                                                                                                                                                                                                                                                                                                                                                                                                                                                                                                                                                                        |

1  
2  
3  
4  
5  
6  
7  
8  
9  
10  
11  
12  
13  
14  
15  
16  
17  
18  
19  
20  
21  
22  
23  
24  
25  
26  
27  
28  
29  
30  
31  
32  
33  
34  
35  
36  
37  
38  
39  
40  
41  
42  
43  
44  
45  
46  
47  
48  
49  
50  
51  
52  
53  
54  
55  
56  
57  
58  
59  
60

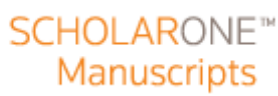



1  
2  
3 **MANUSCRIPT TITLE:** Profile of trauma mortality and trauma care resources at rural  
4 emergency departments and urban trauma centres in Quebec: a population-based retrospective  
5 cohort study  
6  
7  
8  
9

10  
11  
12 **AUTHOR NAMES AND AFFILIATIONS:** Richard Fleet, MD, PhD;<sup>1,2</sup> François Lauzier, MD,  
13 MSc, FRCPC;<sup>3,4</sup> Fatoumata Korinka Tounkara, MSc;<sup>1</sup> Stéphane Turcotte, MSc;<sup>2</sup> Julien Poitras,  
14 MD;<sup>5</sup> Judy Morris, MD, MSc;<sup>6</sup> Mathieu Ouimet, PhD;<sup>7</sup> Jean-Paul Fortin, MD;<sup>5,8</sup> Jeff Plant, MD;<sup>9</sup>  
15  
16  
17  
18  
19 France Légaré, MD, PhD;<sup>3,5</sup> Gilles Dupuis, PhD;<sup>10</sup> Catherine Turgeon-Pelchat, MA<sup>1</sup>

20  
21 <sup>1</sup>Chaire de recherche en médecine d'urgence Université Laval – CISSS Chaudière-Appalaches,  
22 Laval University, Québec, QC, Canada. <sup>2</sup>Centre de recherche du CISSS Chaudière-Appalaches,  
23 Lévis, QC, Canada. <sup>3</sup>Centre de Recherche du CHU de Québec, Laval University, Québec, QC,  
24 Canada. <sup>4</sup>Department of Anesthesiology and Critical Care Medicine, Division of Critical Care  
25 Medicine, Laval University, Québec, QC, Canada. <sup>5</sup>Faculty of Medicine, Laval University,  
26 Québec, QC, Canada. <sup>6</sup>Faculty of Medicine, Université de Montréal, Montréal, QC, Canada.  
27  
28  
29 <sup>7</sup>Département de sciences politiques, Université Laval, Québec, QC, Canada. <sup>8</sup>Centre de  
30 recherche sur les soins et services de première ligne Université Laval, Québec, QC, Canada.  
31  
32  
33  
34  
35  
36  
37  
38  
39  
40 <sup>9</sup>Department of Emergency Medicine, University of British Columbia, Vancouver, BC, Canada.  
41  
42  
43 <sup>10</sup>Département de psychologie, UQAM, Montréal, QC, Canada.

44  
45 **CORRESPONDING AUTHOR:** Richard Fleet, Université Laval-CISSS Chaudière-  
46 Appalaches. 143 Rue Wolfe, Lévis, Québec, G6V 3Z1. Phone: (418) 717-7554. Email:  
47 richard.fleet@fmed.ulaval.ca  
48  
49  
50

51  
52  
53 **WORD COUNT:** Abstract = 275 Manuscript = 2800  
54  
55  
56  
57  
58  
59  
60

## ABSTRACT

**Objectives:** As Canada's second-largest province, the geography of Quebec poses unique challenges for trauma management. Our primary objective was to compare mortality rates between trauma patients treated at rural emergency departments (EDs) and urban trauma centres in Quebec. As a secondary objective, we compared the availability of trauma care resources and services between these two settings.

**Design:** Retrospective cohort study.

**Setting:** 26 rural EDs and 33 level 1 and 2 urban trauma centres in Quebec, Canada.

**Participants:** 79,957 trauma cases collected from Quebec's trauma registry.

**Primary and secondary outcome measures:** Our primary outcome measure was mortality (prehospital, ED, in-hospital). Secondary outcome measures were the availability of trauma-related services and staff specialties at rural and urban facilities. Multivariable generalized linear mixed models were used to determine the relationship between the primary facility and mortality.

**Results:** Overall, 7,215 (9.0%) trauma patients were treated in a rural ED and 72,742 (91.0%) received treatment at an urban centre. Mortality rates were higher in rural EDs compared to urban trauma centres (13.3% vs. 7.9%,  $p < 0.001$ ). After controlling for available potential confounders, the odds of prehospital or ED mortality were over 3 times greater for patients treated in a rural ED (OR 3.44, 95% CI 1.88-6.28). Trauma care setting (rural vs urban) was not associated with in-hospital mortality. Nearly all of the specialized services evaluated were more present at urban trauma centres.

1  
2  
3 **Conclusions:** Trauma patients treated in rural EDs had a higher mortality rate and were more  
4 likely to die prehospital or in the ED compared to patients treated at an urban trauma centre. Our  
5 results were limited by a lack of accurate prehospital times in the trauma registry.  
6  
7  
8  
9

10 **Keywords:** Rural; Urban; Trauma; Mortality; Resources.  
11  
12  
13  
14  
15  
16  
17  
18  
19  
20  
21  
22  
23  
24  
25  
26  
27  
28  
29  
30  
31  
32  
33  
34  
35  
36  
37  
38  
39  
40  
41  
42  
43  
44  
45  
46  
47  
48  
49  
50  
51  
52  
53  
54  
55  
56  
57  
58  
59  
60

For peer review only

### STRENGTHS AND LIMITATIONS OF THIS STUDY

- This is the first study to specifically compare trauma mortality and the availability of trauma-related resources at rural hospitals and urban trauma centres in Canada.
- This is a large retrospective cohort study of 79,957 trauma cases collected from Quebec's trauma registry over a 4-year study period.
- Our analyses included characteristics of trauma patients, their injuries, and the trauma care system to determine the independent association of these factors with mortality.
- Total prehospital times (not available in the current trauma registry), trauma cases initially treated in remote outposts, and long-term functional outcomes were not specifically analyzed in this study.
- Our findings may not be generalizable to other jurisdictions due to differences in population, geography, resources, EMS systems, and the organizational structure of trauma care.

## INTRODUCTION

Trauma is the leading cause of death for Canadians under the age of 40 and the fifth leading cause of death for Canadians of all ages.[1] Although trauma care has improved dramatically since the implementation of organized trauma systems,[2-5] evidence suggests there are considerable differences in mortality between patients receiving care in rural and urban settings.[6-10] These differences may be attributable to longer transport times and limited availability of resources and services at rural hospitals.[11] Furthermore, prehospital mortality accounts for a large proportion of rural trauma deaths.[12]

Approximately 20% of Canadians live in rural areas.[13] Rural traumas commonly occur in the workplace (e.g., industry, mining, farming), during recreational activities (i.e., “higher-risk” outdoor sports), and on the roadways (e.g., poor driving conditions, impaired driving).[6,14] These patients generally receive treatment at rural emergency departments (EDs), which often have limited access to consultation services and advanced imaging. In addition, 44% and 54% of rural EDs are located greater than 300 km from a level 1 or level 2 trauma centre, respectively, thus far exceeding the “golden hour” of trauma care.[15-18] Moreover, access to advanced paramedic care and air medevac capabilities is limited and varies from one provincial jurisdiction to another.[19,20]

As Canada’s second largest province, Quebec faces geographical challenges in providing optimal trauma care to the population. We hypothesized that rural trauma victims in Quebec have worse outcomes compared to urban trauma patients, even in a modern trauma system. The primary objective of this study was to examine mortality rates in trauma patients seen in rural EDs and urban trauma centres across the province. As a secondary objective, we compared the

1  
2  
3 availability of trauma care resources and services at rural EDs and urban trauma centres in  
4  
5 Quebec.  
6  
7  
8  
9

## 10 **METHODS**

### 11 **Setting**

12  
13  
14 Quebec is Canada's second most populous province with 8 million inhabitants in  
15 2016.[21] The trauma system in Quebec was launched in 1993 and involves regionalized care  
16  
17 from rural community hospitals through to urban level 1 trauma centres. This system relies on  
18  
19 standardized EMS resources and care providers that have the same qualifications and use the  
20  
21 same protocols across the province. During the period this study was conducted (2009-2013),  
22  
23 transport triage criteria were based on a combination and adaptation of the prehospital index  
24  
25 (PHI) and high-velocity impact (HVI).[22,23] A PHI score  $\geq 4$  or the presence of any significant  
26  
27 HVI mechanism resulted in direct transport to a trauma centre (level 1 or 2) if it was within 45  
28  
29 minutes of transport time from injury location. The EMS providers also followed the PHI  
30  
31 "noncumulative 5" rule which assumes that casualties scoring a 5 (i.e., lack of vital signs) for  
32  
33 any element of the PHI must be transported to the nearest centre (regardless of trauma  
34  
35 designation) for initial stabilization.  
36  
37  
38  
39  
40  
41  
42  
43  
44

### 45 **Study design and data sources**

46  
47 We performed a retrospective cohort study of all trauma cases in Quebec between 2009  
48  
49 and 2013. The protocol for this study has been previously published.[24] Data were collected  
50  
51 from the Quebec Trauma Registry Information System (BDM-SIRTQ), a population-based  
52  
53 registry under the Ministry of Health and Social Services. The BDM-SIRTQ contains  
54  
55  
56  
57  
58  
59  
60

1  
2  
3 information on victims of unintentional traumatic injuries, victims who died on arrival at the ED  
4 or during ED stay, and victims who were hospitalized in a trauma centre in Quebec. Ethical  
5 approval was obtained from the CISSS Chaudière-Appalaches Research Ethics Committee  
6 (Project MP-2016-003). This study was performed in accordance with the Strengthening the  
7 Reporting of Observational Studies in Epidemiology (STROBE) guidelines for reporting  
8 observational studies.[25]  
9  
10  
11  
12  
13  
14  
15  
16  
17  
18

### 19 **Study definitions and inclusion criteria**

20  
21 For the purposes of this study, all institutions designated by the Health Authority of  
22 Quebec as level 1 or level 2 trauma centres were considered urban centres.[26] Rural EDs were  
23 defined according to the following 4 criteria: 1) located in cities with a population of less than  
24 15,000 (2016 census data); 2) 24/7 physician coverage; 3) hospital with patient admission  
25 capability; and 4) located more than 50 minutes (“golden hour” limit with a 10-minutes margin)  
26 of ground transport from a level 1 or 2 trauma centre. Ground transport times were estimated  
27 using Google Maps.[27]  
28  
29  
30  
31  
32  
33  
34  
35  
36  
37

38 All trauma cases occurring in Quebec during the study period and involving transport  
39 directly to a rural ED or an urban trauma centre were eligible. Deaths at the scene are not  
40 included in the Quebec Trauma Registry. Regarding patient transfers, only trauma cases  
41 transferred from a rural ED to an urban trauma centre were included.  
42  
43  
44  
45  
46  
47  
48

### 49 **Data collection**

50  
51 Data were collected on patient demographics (age, sex), injury characteristics (Injury  
52 Severity Score [ISS], mechanism, type, scene of injury), mode of transport (road ambulance vs  
53  
54  
55  
56  
57  
58  
59  
60

1  
2  
3 other types [e.g., air, personal vehicle]), transfer to an urban trauma centre, hospital admission,  
4 and patient mortality (prehospital, ED, or in-hospital). Data on access to 24/7 in-hospital services  
5 was obtained directly from hospitals in the context of a previous study,[28] and was updated by  
6 phone calls to participating centres in March 2017. These services included access to intensive  
7 care units (ICUs), laboratories, X-ray, computerized tomography (CT) scan, magnetic resonance  
8 imaging (MRI) and ultrasound. We also collected data on the presence of specialities commonly  
9 involved in trauma care (i.e., general and orthopedic surgery, internal medicine, neurology,  
10 anesthesiology).

### 21 22 23 **Statistical analysis**

24  
25  
26 Descriptive statistics were used to analyze the characteristics of trauma cases, as well as  
27 the types of services and specialities available at rural hospitals and urban centres. Means and  
28 standard deviations are presented for continuous variables, and frequencies and proportions for  
29 categorical variables. Variables with missing values are reported as such in the tables. We used  
30 student's t-tests and chi square analysis or Fisher's exact test, as appropriate, to test for  
31 differences in characteristics between patients admitted to rural EDs and those transported  
32 directly to an urban trauma centre. To determine the relationship between the primary facility  
33 (rural ED vs. urban trauma centre) and mortality, bivariate and multivariable generalized linear  
34 mixed models were performed and adjusted for the following variables: age, sex, ISS, injury  
35 mechanism, penetrating injury, scene of injury, cranio-cerebral trauma, ambulance transport, and  
36 transfer. Mortality was considered during the prehospital setting (dead on arrival to initial ED),  
37 the ED setting (death during ED stay or during transfer from one ED to another) and the in-  
38 hospital setting (death after ED discharge to any destination [e.g., hospital department,  
39  
40  
41  
42  
43  
44  
45  
46  
47  
48  
49  
50  
51  
52  
53  
54  
55  
56  
57  
58  
59  
60



1  
2  
3 rehabilitation]). Intraclass coefficient correlations (ICCs) were calculated to assess the  
4 percentage of variance in the model explained by the primary facility. A sensitivity analysis was  
5 performed for the subgroup of severe trauma cases ( $ISS \geq 15$ ). The same generalized linear  
6 mixed model was used to explore the yearly variation in rural versus urban mortality by adding  
7 an interaction term between primary facility and year. All analysis was performed using SAS  
8 (version 9.4, Cary, NC).  
9  
10  
11  
12  
13  
14  
15  
16  
17  
18

### 19 **Patient and public involvement**

20 Neither patients nor the public were directly involved in the development of the research  
21 question, design or measures. However, a second phase of this study will employ the Delphi  
22 method to examine potential solutions for improving trauma care in Quebec; this will include  
23 participation by representatives of trauma patients. The results of both the current investigation  
24 and the second phase of this study will be disseminated to rural patients, hospitals and to the  
25 Ministry of Health.  
26  
27  
28  
29  
30  
31  
32  
33  
34  
35  
36

### 37 **RESULTS**

38 Fifty-nine hospitals met eligibility criteria and were included in the analysis; 26 were  
39 rural EDs and 33 were urban trauma centres (Figure 1). Of the 26 rural EDs, 18 were primary  
40 trauma centres (level 3), 6 were stabilization centres (level 4), and 2 were not designated trauma  
41 centres by the Ministry of Health and Social Services.[24]  
42  
43  
44  
45  
46  
47  
48  
49  
50

### 51 **Hospital services and staff specialists**

On average, rural EDs received 490,000 patient visits per year over the course of the study. Table 1 profiles the services and staff specialists in rural EDs and urban trauma centres in Quebec. Of the 26 rural EDs, 58% (15/26) were more than 150 km from an urban trauma centre. Services available at most rural hospitals included laboratory (100%; 26/26), basic x-ray (92%; 24/26), ICUs (77%, 20/26), bedside ultrasound (73%; 19/26) and CT scanners (69%; 18/26). Few rural EDs had ultrasound services for diagnostic imaging (31%; 8/26), and none had MRI services. While the majority of rural EDs had general surgeons (73%, 19/26) and anesthesiologists (65%; 17/26) on staff, fewer than half had an internal medicine specialist (38%; 10/26), only 12% (3/26) had an orthopedic surgeon, and none had a staff neurosurgeon. In comparison, all of the services and staff specialists examined were available at every urban trauma centre.

**Table 1. Characteristics of rural hospitals and urban trauma centres in Quebec, 2009-2013**

| Characteristic                                  | Rural EDs<br>N = 26 | Urban TCs<br>N = 33 | p value |
|-------------------------------------------------|---------------------|---------------------|---------|
| Distance from Level 1 or 2 trauma centre, n (%) |                     |                     |         |
| ≤150 km                                         | 11 (42)             | -                   | -       |
| 150 to 300 km                                   | 9 (35)              | -                   | -       |
| >300 km or no road                              | 6 (23)              | -                   | -       |
| Types of services offered 24/7, n (%)           |                     |                     |         |
| Laboratory                                      | 26 (100)            | 33 (100)            | 1.00    |
| X-ray                                           | 24 (92)             | 33 (100)            | 0.19    |
| Intensive Care Unit                             | 20 (77)             | 33 (100)            | 0.005   |
| Portable ultrasound device (Bedside ED)         | 19 (73)             | 33 (100)            | 0.002   |
| Computerized Tomography Scan                    | 18 (69)             | 33 (100)            | <0.001  |
| Ultrasound (Radiology) <sup>1</sup>             | 8 (31)              | 33 (100)            | 0.001   |
| Magnetic Resonance Imaging                      | 0 (0)               | 33 (100)            | 0.001   |
| Types of specialists, n (%)                     |                     |                     |         |
| General surgeon                                 | 19 (73)             | 33 (100)            | 0.002   |
| Anesthesiologist                                | 17 (65)             | 33 (100)            | 0.002   |
| Internal medicine specialist                    | 10 (38)             | 33 (100)            | 0.001   |
| Orthopedic surgeon                              | 3 (12)              | 33 (100)            | 0.001   |
| Neurologist                                     | 0 (0)               | 33 (100)            | 0.001   |

ED = emergency department; TC = trauma centre.

<sup>1</sup>Available on weekdays.

### Profile of trauma cases

The 5-year cohort included 110,826 trauma cases in Quebec (Figure 2). Of these, a total of 30,869 cases were excluded from the analysis: 936 cases pertained to traumatic events occurring outside the province, 21,307 cases were treated at ineligible hospitals, and 8,626 cases involved patients who were transferred but not from a rural ED to an urban centre. The remaining 79,957 trauma cases were included, of which 72,742 (91.0%) were treated directly at level 1 or level 2 trauma centres and 7,215 (9.0%) were treated at rural EDs. Among patients taken to a rural ED, 3,827 (53%) were subsequently transferred to an urban centre.

Table 2 compares the characteristics of trauma cases at rural EDs and urban centres. Patients who received care at rural EDs were older than patients treated at urban trauma centres (mean age  $63.3 \pm 24.6$  years vs.  $59.1 \pm 26.3$  years,  $p < 0.001$ ). They were also older than patients who were transferred from rural EDs to urban centres (mean age  $63.3 \pm 24.6$  years vs.  $50.0 \pm 24.4$  years,  $p < 0.001$ ). Patients transferred from a rural facility to an urban trauma centre were more likely to be male than those who were treated at rural hospitals (61% vs. 48%,  $p < 0.001$ ). Overall, injury severity was similar between patients seen in rural EDs (median ISS 9 (IQR 4-9)) and urban trauma centres (median ISS 9 (IQR 4-9)). Most trauma cases were low severity (88.4% of patients had an ISS  $< 15$ ). A greater proportion of patients with ISS  $> 25$  were treated at urban centres. Falls were the most common mechanism of injury in both settings. Urban trauma centres saw a greater proportion of fall-related traumas (69% vs. 66%,  $p < 0.001$ ), and a smaller proportion of traumas from motor vehicle collisions (15% vs. 19%,  $p < 0.001$ ). Injuries occurred most frequently to the limbs, followed by the head and thorax. Injury types were similar between patients treated at rural EDs and urban trauma centres.

**Table 2. Characteristics of trauma cases at rural hospitals and urban trauma centres**

| Characteristic                        | Rural EDs<br>N = 3388 | Transfers <sup>1</sup><br>N = 3827 | p value <sup>2</sup> | Urban TCs<br>N = 72742 | p value <sup>3</sup> |
|---------------------------------------|-----------------------|------------------------------------|----------------------|------------------------|----------------------|
| <b>Demographics<sup>4</sup></b>       |                       |                                    |                      |                        |                      |
| Age, mean (SD)                        | 63.3 (24.6)           | 50.0 (24.4)                        | <0.001               | 59.1 (26.3)            | <0.001               |
| Male, n (%)                           | 1624 (48)             | 2322 (61)                          | <0.001               | 35031 (48)             | 0.80                 |
| ISS, n(%)                             |                       |                                    |                      |                        |                      |
| 1-9                                   | 2823 (83)             | 2907 (76)                          | <0.001               | 56815 (78)             | <0.001               |
| 10-15                                 | 229 (7)               | 281 (7)                            | 0.335                | 7635 (11)              | <0.001               |
| 16-24                                 | 227 (7)               | 312 (8)                            | 0.019                | 4659 (6)               | 0.496                |
| ≥ 25                                  | 109 (3)               | 327 (9)                            | <0.001               | 3633 (5)               | <0.001               |
| <b>Injury mechanism, n (%)</b>        |                       |                                    |                      |                        |                      |
| Fall                                  | 2252 (66)             | 2113 (55)                          | <0.001               | 50462 (69)             | <0.001               |
| MVC                                   | 628 (19)              | 971 (25)                           | <0.001               | 10812 (15)             | <0.001               |
| Other                                 | 508 (15)              | 743 (20)                           | <0.001               | 11468 (16)             | 0.23                 |
| <b>Scene of injury, n (%)</b>         |                       |                                    |                      |                        |                      |
| Home                                  | 1616 (47)             | 645 (17)                           | <0.001               | 22550 (31)             | <0.001               |
| Street/road                           | 497 (15)              | 624 (16)                           | 0.06                 | 11908 (16)             | 0.009                |
| Other                                 | 1275 (38)             | 2558 (67)                          | <0.001               | 38284 (53)             | <0.001               |
| <b>Injury type,<sup>5</sup> n (%)</b> |                       |                                    |                      |                        |                      |
| Head                                  | 643 (19)              | 661 (17)                           |                      | 12188 (17)             |                      |
| Face                                  | 321 (9)               | 534 (14)                           |                      | 9187 (13)              |                      |
| Neck                                  | 37 (1)                | 40 (1)                             |                      | 977 (1)                |                      |
| Thorax                                | 709 (21)              | 430 (11)                           |                      | 10586 (15)             |                      |
| Abdominal                             | 195 (6)               | 198 (5)                            |                      | 4260 (6)               |                      |
| Spinal                                | 521 (15)              | 449 (12)                           |                      | 7906 (11)              |                      |
| Upper limb                            | 784 (23)              | 1182 (31)                          |                      | 21659 (30)             |                      |
| Lower limb                            | 1355 (40)             | 2069 (54)                          |                      | 40032 (55)             |                      |
| Presence of cranio-cerebral trauma    | 345 (10)              | 437 (11)                           |                      | 7977 (11)              |                      |
| Undetermined                          | 176 (5)               | 104 (3)                            |                      | 2146 (3)               |                      |
| <b>Transport, n (%)</b>               |                       |                                    |                      |                        |                      |
| Ambulance                             | 2524 (74)             | 1749 (46)                          | <0.001               | 54745 (75)             | 0.32                 |
| Air                                   | 1 (<1)                | 5 (<1)                             | 0.2237               | 61 (<1)                | 0.984                |
| Other                                 | 424 (13)              | 252 (6)                            | <0.001               | 2757 (4)               | <0.001               |
| Unknown                               | 439 (13)              | 1821 (48)                          | <0.001               | 15179 (21)             | <0.001               |

ED = emergency department; TC = trauma centre; SD = standard deviation; ISS = Injury Severity Score; MVC = motor vehicle collision.

<sup>1</sup>Patients transferred from rural EDs to urban trauma centres.

<sup>2</sup>Significance for difference in characteristics between trauma patients admitted to rural EDs and trauma patients transferred from rural EDs to urban centres.

<sup>3</sup>Significance for difference in characteristics between trauma patients admitted to rural EDs and trauma patients transported directly to urban centres.

<sup>4</sup>Data was unavailable for 258 patients.

<sup>5</sup>Some patients had >1 injury type.

## Trauma mortality

Overall mortality for patients seen in rural hospitals (i.e., not transferred) was 13.3% versus 7.9% for patients treated in urban level 1 and level 2 trauma centres ( $p < 0.001$ ). Compared to either of these groups, patients who were initially assessed and stabilized in rural EDs and subsequently transferred to an urban centre for definitive care had significantly lower overall mortality (3.1%,  $p < 0.001$ ). There were 113 patients (3%) that died during the transfer interval. Table 3 shows crude and adjusted odds ratios for the association between mortality (prehospital or ED, in-hospital) and various patient-level and institution-level factors. The odds of death prehospital or in the ED was over 3 times greater for trauma patients treated in a rural ED (OR 3.37, 95% CI 1.85-6.13). Trauma care setting (rural vs urban) was not associated with in-hospital mortality. Similar results were obtained following a sensitivity analysis limited to severe trauma cases (ISS  $\geq 15$ ) (Supplementary Material, Table 1).

**Table 3. Regression analysis of the relationship between rural ED admission and trauma mortality**

| Variable                                      | Prehospital or ED mortality |                                      | In-hospital mortality |                                      |
|-----------------------------------------------|-----------------------------|--------------------------------------|-----------------------|--------------------------------------|
|                                               | Crude OR<br>(95% CI)        | Adjusted OR <sup>1</sup><br>(95% CI) | Crude OR<br>(95% CI)  | Adjusted OR <sup>1</sup><br>(95% CI) |
| Admitting facility (Ref: Urban trauma centre) |                             |                                      |                       |                                      |
| Rural ED                                      | 0.98 (0.63-1.54)            | 3.37 (1.85-6.13)                     | 0.77 (0.58-1.01)      | 0.93 (0.76-1.14)                     |
| Age (Ref: $\geq 65$ )                         |                             |                                      |                       |                                      |
| 0-15 years                                    | 0.97 (0.74-1.26)            | 0.73 (0.55-0.98)                     | 0.02 (0.01-0.04)      | 0.04 (0.02-0.07)                     |
| 16-64 years                                   | 5.46 (4.95-6.03)            | 1.99 (1.76-2.25)                     | 0.16 (0.14-0.17)      | 0.16 (0.15-0.18)                     |
| Male                                          | 3.65 (3.33-4.00)            | 1.91 (1.72-2.12)                     | 0.90 (0.84-0.96)      | 1.33 (1.23-1.43)                     |
| ISS (Ref: $\geq 25$ )                         |                             |                                      |                       |                                      |
| 1-9                                           | 0.14 (0.13-0.16)            | 0.34 (0.29-0.39)                     | 0.12 (0.11-0.13)      | 0.10 (0.09-0.11)                     |
| 10-15                                         | 0.11 (0.09-0.13)            | 0.16 (0.13-0.19)                     | 0.16 (0.14-0.18)      | 0.13 (0.11-0.15)                     |
| 16-24                                         | 0.24 (0.20-0.28)            | 0.28 (0.23-0.34)                     | 0.26 (0.23-0.30)      | 0.23 (0.20-0.27)                     |
| Injury mechanism (Ref: Other)                 |                             |                                      |                       |                                      |
| Fall                                          | 0.04 (0.03-0.04)            | 0.04 (0.03-0.05)                     | 2.81 (2.45-3.22)      | 1.16 (0.99-1.36)                     |
| MVC                                           | 0.63 (0.57-0.69)            | 0.49 (0.42-0.59)                     | 1.22 (1.02-1.45)      | 0.86 (0.69-1.09)                     |
| Penetrating injury (Ref: None)                |                             |                                      |                       |                                      |
| Lower/upper limbs                             | 1.09 (0.74-1.60)            | 0.34 (0.23-0.52)                     | 0.21 (0.10-0.42)      | 0.67 (0.33-1.37)                     |
| Thorax/abdomen/back                           | 11.24 (9.71-13.00)          | 1.89 (1.58-2.26)                     | 0.76 (0.56-1.04)      | 1.35 (0.95-1.92)                     |
| Scene of injury (Ref: Other)                  |                             |                                      |                       |                                      |
| Road/Street                                   | 5.10 (4.60-5.66)            | 1.87 (1.59-2.21)                     | 0.68 (0.60-0.77)      | 0.66 (0.55-0.78)                     |
| Domicile                                      | 2.86 (2.59-3.16)            | 4.03 (3.58-4.54)                     | 1.82 (1.70-1.96)      | 1.16 (1.07-1.25)                     |
| Cranio-cerebral trauma                        | 2.06 (1.86-2.29)            | 1.65 (1.45-1.88)                     | 2.53 (2.32-2.76)      | 1.16 (1.03-1.30)                     |
| Ambulance transport                           | 14.04 (10.94-18.03)         | 14.69 (11.30-19.09)                  | 7.15 (6.14-8.32)      | 4.21 (3.60-4.93)                     |

|          |                  |                  |                  |                  |
|----------|------------------|------------------|------------------|------------------|
| Transfer | 0.02 (0.01-0.04) | 0.01 (0.01-0.02) | 0.61 (0.48-0.78) | 0.98 (0.74-1.29) |
|----------|------------------|------------------|------------------|------------------|

ED = emergency department; OR = odds ratio; CI = confidence interval; MVC = motor vehicle collision.

<sup>1</sup>Adjusted for age, sex, Injury Severity Score, injury mechanism, scene of injury, penetrating injury, cranio-cerebral trauma, ambulance transport and transfer.

Intraclass coefficient: 0.15 for prehospital or ED mortality, 0.06 for in-hospital mortality.

We compared adjusted mortality rate fluctuations between 2009 and 2013 for participating centres (Supplementary Material, Figure 1). Mortality in rural EDs over the five-year study period decreased by 3.74% versus 2.34% for urban trauma centres, but this difference was not significant ( $p = 0.18$ ). Despite decreased trauma mortality at both urban and rural hospitals, the gap in mortality between these two settings remained constant.

## DISCUSSION

This is the first study to describe and compare trauma cases presenting to rural EDs and urban centres in the province of Quebec. We found that overall mortality was greater for trauma patients seen in rural EDs (13.3% vs. 7.9%). After adjusting for potential available confounders, the odds of prehospital or ED mortality were more than 3 times greater for trauma patients treated in rural EDs compared to urban trauma centres. Although mortality rates decreased at both rural and urban centres over the 5-year study period, the mortality gap between these settings remained constant. Roughly half of rural ED cases that survived the initial stabilization phase were transferred to an urban trauma centre; these patients had significantly lower mortality rates than non-transferred patients despite having greater injury severity. Compared to rural EDs, a larger proportion of urban centres offered all services (with the exception of laboratory and x-ray) and employed all types of staff specialists evaluated. Taken together, our findings demonstrate important differences in available care and outcomes for trauma patients in Quebec.

1  
2  
3 There are several limitations to this study. First, this was an analysis of data collected  
4 from a provincial trauma registry and thus subject to the inherent confines of retrospective  
5 studies. Data for some of the variables assessed were incomplete. Furthermore, the trauma  
6 registry does not capture the time interval from the 911 call to ambulance arrival at the scene  
7 which precluded our ability to calculate total prehospital times; this is a significant limitation of  
8 this study as prehospital time is a critical potential confounder. Second, this study did not include  
9 trauma cases that were initially treated in remote outposts. Hence, our results may have  
10 minimized trauma mortality in areas that were more resource-limited, or isolated and vulnerable.  
11 Moreover, this study was not designed to compare long-term functional outcomes following  
12 trauma; this could be the focus of future studies. Finally, although this study was conducted in  
13 Canada's second-largest province, our findings may not be generalizable to other jurisdictions  
14 due to differences in population, geography, resources, EMS systems, and in the organizational  
15 structure of trauma care.  
16  
17  
18  
19  
20  
21  
22  
23  
24  
25  
26  
27  
28  
29  
30  
31  
32

33 Our observation that mortality rates were higher in trauma cases at rural EDs, especially  
34 in the pre-hospital phase, is consistent with previous studies.[6,7,29,30] Indeed, higher mortality  
35 rates in the prehospital phase of care have been reported in the literature for more than 20  
36 years.[7,31] In a population-based analysis of all trauma deaths in the province of Ontario,  
37 Gomez et al. found that over half of rural trauma deaths occurred in the prehospital setting.[30]  
38 Furthermore, among trauma patients that survived long enough to reach hospital, the risk of ED  
39 mortality was 3 times greater for patients injured in areas with limited access to trauma centre  
40 care. In another study of trauma patients served by EMS in rural and urban counties in Oregon  
41 and Washington, Newgard et al. found that half of rural trauma deaths occurred prehospital, and  
42 that 90% of rural deaths took place within 24 hours of injury (compared to 64% of urban  
43  
44  
45  
46  
47  
48  
49  
50  
51  
52  
53  
54  
55  
56  
57  
58  
59  
60

1  
2  
3 deaths).[12] Although overall mortality rates did not differ between rural and urban regions, the  
4 authors suggested that the lack of a statistically significant difference may reflect a rural sample  
5 size that was underpowered to detect such a difference. It has been noted that the overall  
6 prehospital period in the United States is almost one third longer in rural settings compared to  
7 urban environments.[32] Several studies conducted in Quebec suggest there is an association  
8 between total prehospital time and mortality in seriously injured patients, which is consistent  
9 with the concept of the “golden hour” in trauma.[33,34] Although time to definitive care is a  
10 major determinant of trauma outcomes, assessing this relationship across a field-defined  
11 population of injured persons using EMS intervals has generally produced inconclusive  
12 results.[12] Furthermore, testing the hypothesis that shorter EMS intervals improve outcomes  
13 requires rigorous study designs that are often impracticable.  
14  
15  
16  
17  
18  
19  
20  
21  
22  
23  
24  
25  
26  
27

28 This study is part of a larger project aimed at finding solutions to improve rural trauma  
29 and emergency care in Quebec.[24] A Delphi phase to this project is currently underway, as well  
30 as a large-scale qualitative study that mobilizes multiple stakeholders (citizens, decision makers,  
31 health care professionals) to participate in efforts to improve rural emergency care.[35] Potential  
32 solutions currently being explored include improving databases to better capture EMS  
33 intervals,[24] piloting the implementation of a helicopter EMS system,[36] incorporating  
34 telehealth in the prehospital and rural ED settings,[37,38] and deploying mobile trauma  
35 simulation training programs in rural EDs.[39] These solutions could be deployed in rural areas,  
36 that are most at risk for trauma mortality.  
37  
38  
39  
40  
41  
42  
43  
44  
45  
46  
47  
48  
49  
50

## 51 CONCLUSIONS

52  
53  
54  
55  
56  
57  
58  
59  
60



1  
2  
3 The results of this study illustrate significant differences in mortality and resource  
4 availability at rural hospitals and urban trauma centres in Quebec. The likelihood of mortality  
5 was over 3 times higher for patients treated at rural EDs versus urban trauma centres. While  
6 mortality rates decreased at both rural and urban facilities over the study period, the gap in  
7 mortality between these settings remained constant; this is a finding of concern in a universal  
8 health care system. Solutions to improve trauma care in Quebec are currently being explored and  
9 deployed.

## 20 21 **CONTRIBUTORS**

22  
23  
24 RF, JPoi, MO, JPF, FLé, FLau and GD conceived the study, designed the protocol, and  
25 obtained research funding. RF and CTP performed the literature search. RF, FKT, and ST  
26 supervised data collection. RF, FLau, JPla, JM and ST provided statistical advice on study design  
27 and analyzed the data. All authors contributed to interpreting the data and drafting the  
28 manuscript. All authors critically reviewed the manuscript for important intellectual content,  
29 approved the final version of the submitted manuscript, and agree to be accountable for all  
30 aspects of the work.

## 31 32 33 34 35 36 37 38 39 40 41 42 43 **ACKNOWLEDGEMENTS**

44  
45 The authors thank Percipient Research & Consulting for assisting with language editing.

## 46 47 48 49 50 **FUNDING**

51  
52 This work was supported by the Fonds de Recherche en Santé du Québec (FRSQ) -  
53 Consortium pour le développement de la recherche en traumatologie 2015-2018.

1  
2  
3  
4  
5 **COMPETING INTERESTS**  
6

7  
8 None declared.  
9

10  
11  
12 **PATIENT CONSENT**  
13

14  
15 Not required.  
16

17  
18  
19 **ETHICS APPROVAL**  
20

21 This study was approved by the CISSS Chaudière-Appalaches Research Ethics  
22  
23  
24 Committee (Project MP-2016-003).  
25  
26

27  
28 **DATA SHARING STATEMENT**  
29

30  
31  
32 Data may be obtained from the Quebec Trauma Registry Information System (BDM-SIRTQ), a  
33  
34 population-based registry under the Ministry of Health and Social Services.  
35  
36  
37  
38  
39  
40  
41  
42  
43  
44  
45  
46  
47  
48  
49  
50  
51  
52  
53  
54  
55  
56  
57  
58  
59  
60

## REFERENCES

1. Statistics Canada. Table 13-10-0394-01 Leading causes of death, total population, by age group. Available from: <https://www150.statcan.gc.ca/t1/tbl1/en/tv.action?pid=1310039401> (Accessed July 12 2018).
2. Kuimi BLB, Moore L, Cissé B, et al. Influence of access to an integrated trauma system on in-hospital mortality and length of stay. *Injury* 2015;46:1257-61.
3. Moore L, Champion H, Tardif P-A, et al. Impact of trauma system structure on injury outcomes: a systematic review and meta-analysis. *World J Surg* 2018;42:1327-39.
4. MacKenzie EJ, Rivara FP, Jurkovich GJ, et al. The national study on costs and outcomes of trauma. *J Trauma* 2007;63:S54-67, S81-6.
5. Moore L, Turgeon AF, Lauzier F, et al. Evolution of patient outcomes over 14 years in a mature, inclusive Canadian trauma system. *World J Surg* 2015;39:1397-405.
6. Peek-Asa C, Zwerling C, Stallones L. Acute traumatic injuries in rural populations. *Am J Public Health* 2004;94:1689-93.
7. Mitchell RJ, Chong S. Comparison of injury-related hospitalised morbidity and mortality in urban and rural areas in Australia. *Rural Remote Health* 2010;10:1326.
8. Kim K, Ozegovic D, Voaklander DC. Differences in incidence of injury between rural and urban children in Canada and the USA: a systematic review. *Inj Prev* 2012;18:264-71.
9. Pampalon R, Martinez J, Hamel D. Does living in rural areas make a difference for health in Quebec? *Health Place* 2006;12:421-35.

- 1  
2  
3 10. Lagacé C, Desmeules M, Pong RW, et al. Non-communicable disease and injury-related  
4 mortality in rural and urban places of residence: a comparison between Canada and Australia.  
5  
6 *Can J Public Health* 2007;98:S62-9.  
7  
8  
9  
10 11. Jarman MP, Castillo RC, Carlini AR, et al. Rural risk: geographic disparities in trauma  
11 mortality. *Surgery* 2016;160:1551-9.  
12  
13  
14 12. Newgard CD, Fu R, Bulger E, et al. Evaluation of rural vs urban trauma patients served by 9-  
15 1-1 emergency medical services. *JAMA Surg* 2017;152:11-8.  
16  
17  
18 13. Statistics Canada. Table 17-10-0118-01 Selected population characteristics, Canada,  
19 provinces and territories. Available from:  
20  
21 <https://www150.statcan.gc.ca/t1/tb11/en/tv.action?pid=1710011801> (Accessed August 5 2018).  
22  
23  
24 14. Garcia MC, Faul M, Massetti G, et al. Reducing potentially excess deaths from the five  
25 leading causes of death in the rural United States. *MMWR Surveill Summ* 2017;66:1-7.  
26  
27  
28 15. Fleet R, Audette LD, Marcoux J, et al. Comparison of access to services in rural emergency  
29 departments in Quebec and British Columbia. *CJEM* 2014;16:437-48.  
30  
31  
32 16. Fleet R, Pelletier C, Marcoux J, et al. Differences in access to services in rural emergency  
33 departments of Quebec and Ontario. *PLoS One* 2015;10:e0123746.  
34  
35  
36 17. Fleet R, Poitras J, Maltais-Giguere J, et al. A descriptive study of access to services in a  
37 random sample of Canadian rural emergency departments. *BMJ Open* 2013;3:e003876.  
38  
39  
40 18. Bergeron C, Fleet R, Tounkara FK, et al. Lack of CT scanner in a rural emergency  
41 department increases inter-facility transfers: a pilot study. *BMC Res Notes* 2017;10:772.  
42  
43  
44 19. Nolan B, Tien H, Sawadsky B, et al. Comparison of helicopter emergency medical services  
45 transport types and delays on patient outcomes at two level I trauma centers. *Prehosp Emerg*  
46 *Care* 2017;21:327-33.  
47  
48  
49  
50  
51  
52  
53  
54  
55  
56  
57  
58  
59  
60

- 1  
2  
3 20. Dalton M. Quebec's lack of emergency air ambulance system 'embarrassing,' renowned  
4 doctor says. CBC News. Available from: [https://www.cbc.ca/news/canada/montreal/quebec-air-](https://www.cbc.ca/news/canada/montreal/quebec-air-ambulance-david-mulder-1.4614451)  
5  
6 ambulance-david-mulder-1.4614451 (Accessed June 12 2018).  
7  
8  
9  
10 21. Statistics Canada. Census profile, 2016 census. Available from:  
11  
12 <http://www12.statcan.gc.ca/census-recensement/2016/dp-pd/prof/index.cfm?Lang=E> (Accessed  
13  
14 June 8 2018).  
15  
16  
17 22. Koehler JJ, Baer LJ, Malafa SA, et al. Prehospital Index: a scoring system for field triage of  
18  
19 trauma victims. *Ann Emerg Me* 1986;15:178-82.  
20  
21  
22 23. Lavoie A, Bourgeois G, Lapointe J. Notice regarding field trauma criteria. *ETMIS* 2013;9:1-  
23  
24 46.  
25  
26 24. Fleet R, Tounkara FK, Ouimet M, et al. Portrait of trauma care in Quebec's rural emergency  
27  
28 departments and identification of priority intervention needs to improve the quality of care: a  
29  
30 study protocol. *BMJ Open* 2016;6:e010900.  
31  
32  
33 25. Von Elm E, Altman DG, Egger M, et al. Strengthening the Reporting of Observational  
34  
35 Studies in Epidemiology (STROBE) statement: guidelines for reporting observational studies.  
36  
37 *BMJ* 2007;335:806-8.  
38  
39  
40 26. Ministère de la santé et des services sociaux. Cadre normatif du Système d'information du  
41  
42 Registre des traumatismes du Québec - Annexe 13 Liste des installations désignées. Available  
43  
44 from: [http://publications.msss.gouv.qc.ca/msss/document-](http://publications.msss.gouv.qc.ca/msss/document-001684/?&txt=registre&msss_valpub&date=DESC&titre=ASC)  
45  
46 001684/?&txt=registre&msss\_valpub&date=DESC&titre=ASC (Accessed June 8 2018).  
47  
48  
49 27. Wallace DJ, Kahn JM, Angus DC, et al. Accuracy of prehospital transport time estimation.  
50  
51 *Acad Emerg Med* 2014;21:9-16.  
52  
53  
54  
55  
56  
57  
58  
59  
60

- 1  
2  
3 28. Fleet R, Poitras J, Archambault P, et al. Portrait of rural emergency departments in Québec  
4 and utilization of the provincial emergency department management guide: cross sectional  
5  
6 survey. *BMC Health Serv Res* 2015;15:572.  
7  
8  
9  
10 29. Fatovich DM, Phillips M, Langford SA, et al. A comparison of metropolitan vs rural major  
11 trauma in Western Australia. *Resuscitation* 2011;82:886-90.  
12  
13  
14 30. Gomez D, Berube M, Xiong W, et al. Identifying targets for potential interventions to reduce  
15 rural trauma deaths: a population-based analysis. *J Trauma* 2010;69:633-9.  
16  
17  
18 31. Rogers FB, Shackford SR, Hoyt DB, et al. Trauma deaths in a mature urban vs rural trauma  
19 system: a comparison. *Arch Surg* 1997;132:376-82.  
20  
21  
22 32. Carr BG, Caplan JM, Pryor JP, et al. A meta-analysis of prehospital care times for trauma.  
23  
24 *Prehosp Emerg Care* 2006;10:198-206.  
25  
26  
27 33. Sampalis JS, Denis R, Lavoie A, et al. Trauma care regionalization: a process-outcome  
28 evaluation. *J Trauma* 1999;46:565-81.  
29  
30  
31 34. Sampalis JS, Lavoie A, Williams J, et al. Impact of on-site care, prehospital time, and level  
32 of in-hospital care on survival in severely injured patients. *J Trauma* 1993;34:252-61.  
33  
34  
35 35. Fleet R, Dupuis G, Fortin J-P, et al. Rural emergency care 360°: mobilising healthcare  
36 professionals, decision-makers, patients and citizens to improve rural emergency care in the  
37 province of Quebec, Canada: a qualitative study protocol. *BMJ Open* 2017;7:e016039.  
38  
39  
40 36. Touzin C. Transport de patients par hélicoptère: Québec lance un projet pilote. La Presse.  
41 Available from: [https://www.lapresse.ca/actualites/sante/201806/21/01-5186809-transport-de-](https://www.lapresse.ca/actualites/sante/201806/21/01-5186809-transport-de-patients-par-helicoptere-quebec-lance-un-projet-pilote.php)  
42 [patients-par-helicoptere-quebec-lance-un-projet-pilote.php](https://www.lapresse.ca/actualites/sante/201806/21/01-5186809-transport-de-patients-par-helicoptere-quebec-lance-un-projet-pilote.php) (Accessed July 18 2018).  
43  
44  
45 37. Amadi-Obi A, Gilligan P, Owens N, et al. Telemedicine in pre-hospital care: a review of  
46 telemedicine applications in the pre-hospital environment. *Int J Emerg Med* 2014;7:29.  
47  
48  
49  
50  
51  
52  
53  
54  
55  
56  
57  
58  
59  
60

1  
2  
3 38. Duchesne JC, Kyle A, Simmons J, et al. Impact of telemedicine upon rural trauma care. *J*  
4 *Trauma* 2008;64:92-8.  
5

6  
7 39. Martin D, Bekiaris B, Hansen G. Mobile emergency simulation training for rural health  
8 providers. *Rural Remote Health* 2017;17:4057.  
9  
10  
11  
12  
13  
14  
15  
16  
17  
18  
19  
20  
21  
22  
23  
24  
25  
26  
27  
28  
29  
30  
31  
32  
33  
34  
35  
36  
37  
38  
39  
40  
41  
42  
43  
44  
45  
46  
47  
48  
49  
50  
51  
52  
53  
54  
55  
56  
57  
58  
59  
60

For peer review only

1  
2  
3 **FIGURE LEGENDS**  
4  
5  
6  
7

8 **Figure 1. Map of rural emergency departments and Level 1 and 2 trauma centres included**  
9 **in the study**  
10  
11

12  
13  
14 **Figure 2. Flow chart of trauma cases seen in rural emergency departments and urban**  
15 **trauma centres in Quebec between 2009 and 2013. ED = emergency department; TC =**  
16 **trauma centre**  
17  
18  
19  
20  
21  
22  
23  
24  
25  
26  
27  
28  
29  
30  
31  
32  
33  
34  
35  
36  
37  
38  
39  
40  
41  
42  
43  
44  
45  
46  
47  
48  
49  
50  
51  
52  
53  
54  
55  
56  
57  
58  
59  
60



1  
2  
3 **SUPPLEMENTARY MATERIALS**  
4  
5  
6  
7

8 **Supplementary Table 1. Sensitivity analysis of the relationship between rural ED**  
9 **admission and trauma mortality**  
10  
11

12  
13  
14 **Supplementary Figure 1. Trends in trauma mortality at rural emergency departments and**  
15 **urban trauma centres in Quebec, 2009-2013.**  
16  
17  
18  
19  
20  
21  
22  
23  
24  
25  
26  
27  
28  
29  
30  
31  
32  
33  
34  
35  
36  
37  
38  
39  
40  
41  
42  
43  
44  
45  
46  
47  
48  
49  
50  
51  
52  
53  
54  
55  
56  
57  
58  
59  
60

1  
2  
3  
4  
5  
6  
7  
8  
9  
10  
11  
12  
13  
14  
15  
16  
17  
18  
19  
20  
21  
22  
23  
24  
25  
26  
27  
28  
29  
30  
31

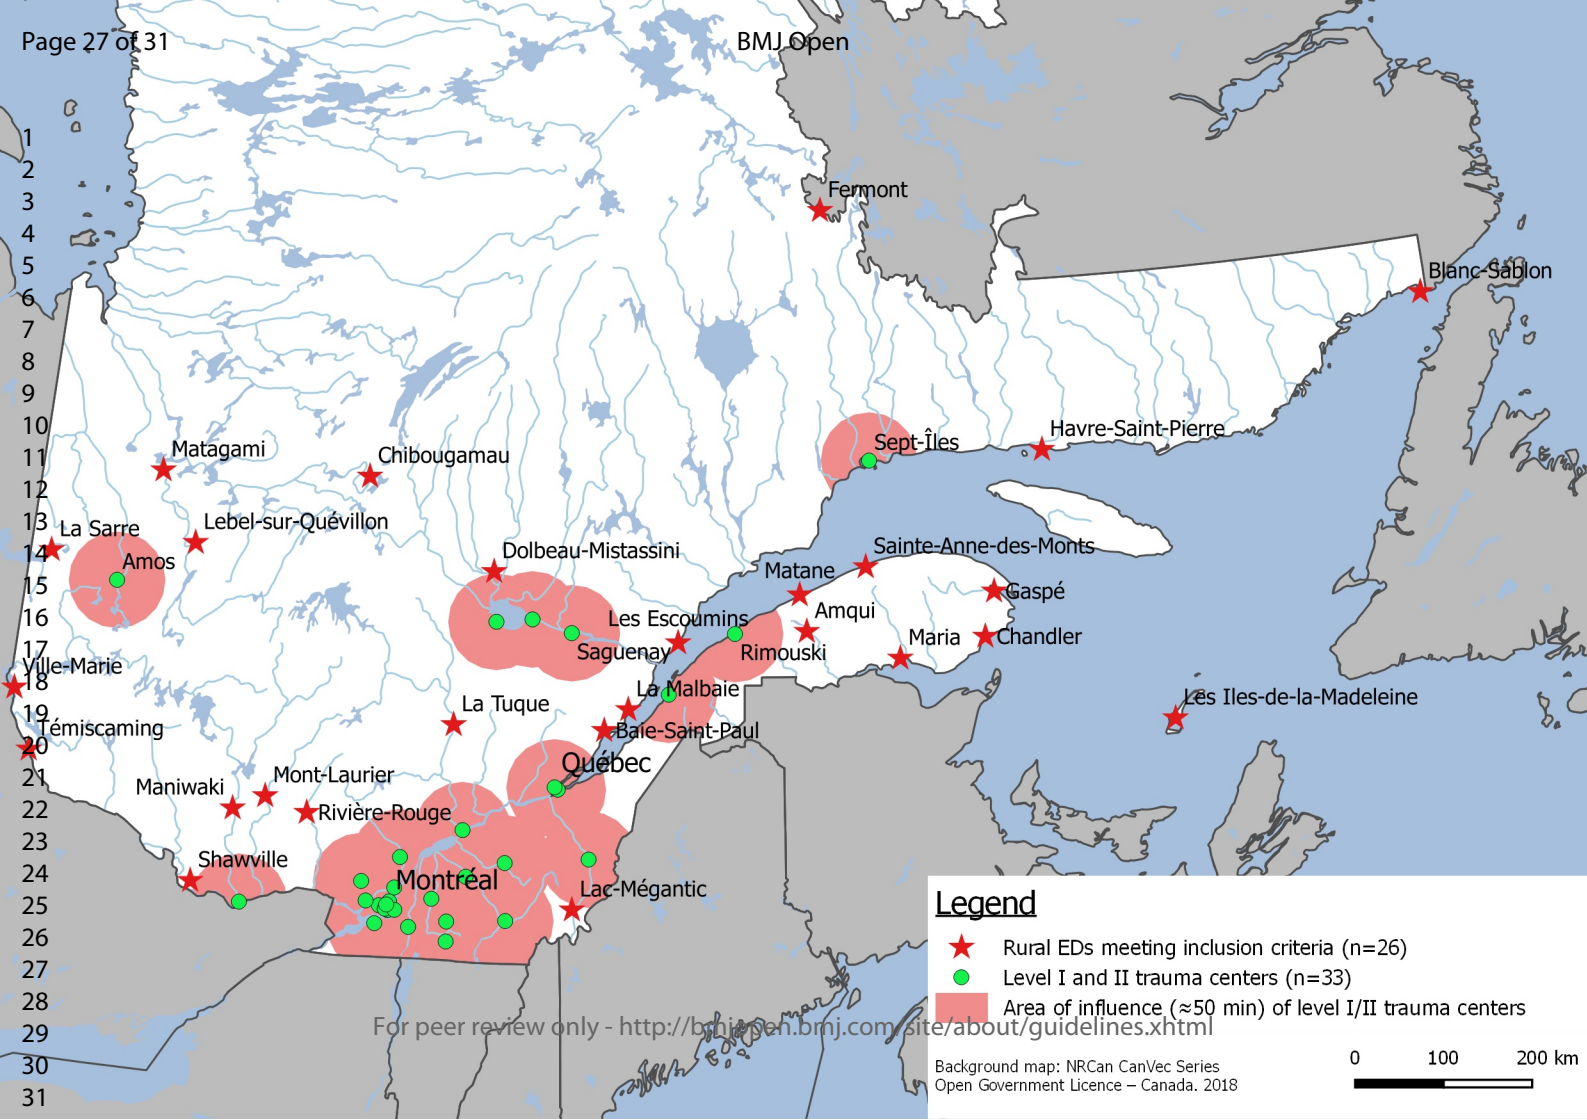

**Legend**

- ★ Rural EDs meeting inclusion criteria (n=26)
- Level I and II trauma centers (n=33)
- Area of influence (≈50 min) of level I/II trauma centers

Background map: NRCan CanVec Series  
Open Government Licence – Canada. 2018

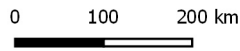

1  
2  
3  
4  
5  
6  
7  
8  
9  
10  
11  
12  
13  
14  
15  
16  
17  
18

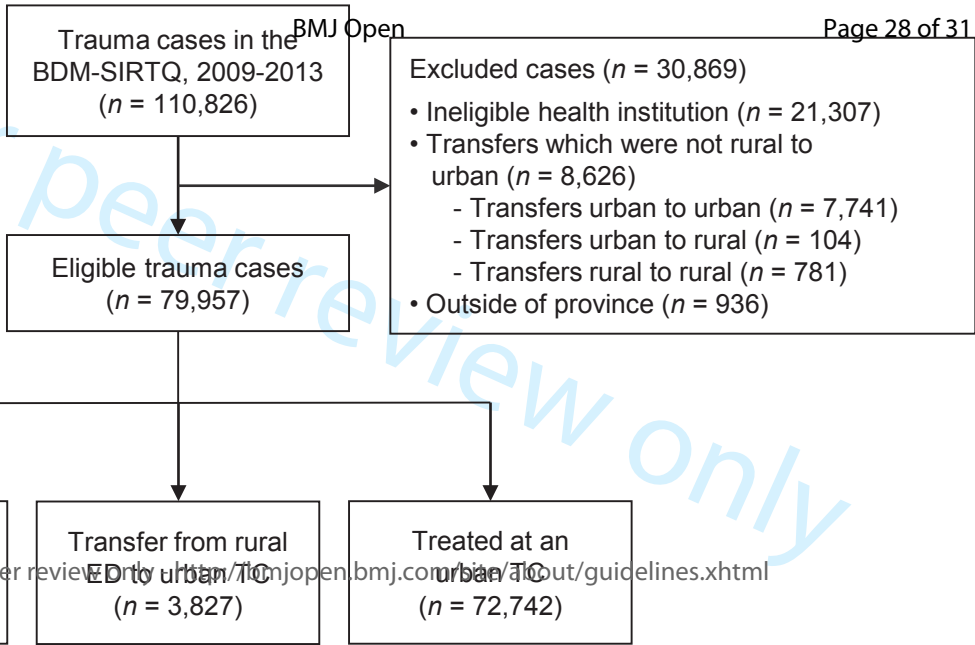

For peer review only  
http://bmjopen.bmj.com/lookup/guidelines.xhtml

**Supplementary Table 1. Sensitivity analysis of the relationship between rural ED admission and trauma mortality**

| Variable                                      | Prehospital or ED mortality,<br>Adjusted OR <sup>1</sup> (95% CI) | In-hospital mortality,<br>Adjusted OR <sup>1</sup> (95% CI) |
|-----------------------------------------------|-------------------------------------------------------------------|-------------------------------------------------------------|
| Admitting facility (Ref: Urban trauma centre) |                                                                   |                                                             |
| Rural ED                                      | 4.49 (2.23-9.02)                                                  | 1.24 (0.80-1.92)                                            |
| Age (Ref: ≥ 65)                               |                                                                   |                                                             |
| 0-15 years                                    | 1.21 (0.66-2.20)                                                  | 0.16 (0.08-0.31)                                            |
| 16-64 years                                   | 1.04 (0.83-1.30)                                                  | 0.26 (0.22-0.31)                                            |
| Male                                          | 1.15 (0.94-1.40)                                                  | 0.98 (0.84-1.13)                                            |
| ISS (Ref: ≥ 25)                               |                                                                   |                                                             |
| 16-24                                         | 0.21 (0.17-0.26)                                                  | 0.25 (0.21-0.29)                                            |
| Injury mechanism (Ref: Other)                 |                                                                   |                                                             |
| Fall                                          | 0.18 (0.13-0.24)                                                  | 0.91 (0.69-1.20)                                            |
| MVC                                           | 0.44 (0.32-0.63)                                                  | 0.68 (0.48-0.96)                                            |
| Penetrating injury (Ref: None)                |                                                                   |                                                             |
| Lower/upper limbs                             | 3.51 (1.30-9.51)                                                  | 2.56 (0.68-9.66)                                            |
| Thorax/abdomen/back                           | 3.84 (2.83-5.22)                                                  | 1.21 (0.76-1.94)                                            |
| Scene of injury (Ref: Other)                  |                                                                   |                                                             |
| Road/street                                   | 1.41 (1.04-1.91)                                                  | 1.04 (0.80-1.34)                                            |
| Domicile                                      | 1.52 (1.19-1.93)                                                  | 1.44 (1.22-1.70)                                            |
| Cranio-cerebral trauma                        | 0.99 (0.82-1.19)                                                  | 1.29 (1.12-1.50)                                            |
| Ambulance transport                           | 4.33 (2.63-7.13)                                                  | 5.07 (3.57-7.21)                                            |
| Transfer                                      | 0.01 (0.00-0.02)                                                  | 0.83 (0.50-1.36)                                            |

ED, emergency department; OR, odds ratio; CI, confidence interval; MVC, motor vehicle collision.  
<sup>1</sup>Adjusted for age, sex, Injury Severity Score, injury mechanism, scene of injury, penetrating injury, cranio-cerebral trauma, ambulance transport and transfer.

1  
2  
3  
4  
5  
6  
7  
8  
9  
10  
11  
12  
13  
14  
15  
16  
17  
18  
19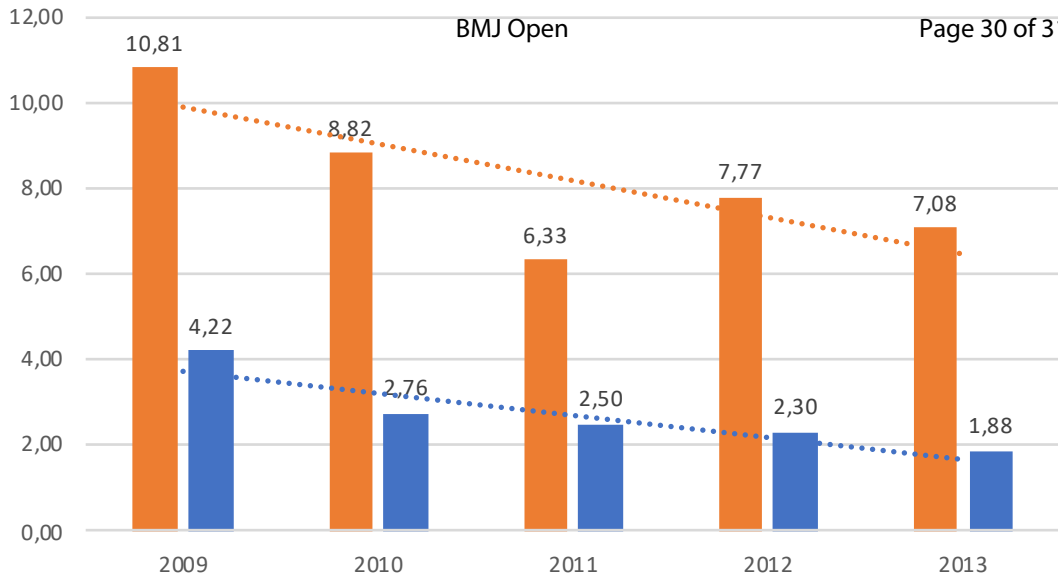

For peer review only - <http://bmjopen.bmj.com/site/about/guidelines.xhtml>

■ Rural ■ Urban ..... Linéaire (Rural) ..... Linéaire (Urban)

1 STROBE Statement—Checklist of items that should be included in reports of *cohort studies*

|                              | Item No | Recommendation                                                                                                                                                                                                                                                                                                                                                                                           |
|------------------------------|---------|----------------------------------------------------------------------------------------------------------------------------------------------------------------------------------------------------------------------------------------------------------------------------------------------------------------------------------------------------------------------------------------------------------|
| <b>Title and abstract</b>    | 1       | (a) Indicate the study's design with a commonly used term in the title or the abstract – <b>Page 1</b><br>(b) Provide in the abstract an informative and balanced summary of what was done and what was found – <b>Page 2</b>                                                                                                                                                                            |
| <b>Introduction</b>          |         |                                                                                                                                                                                                                                                                                                                                                                                                          |
| Background/rationale         | 2       | Explain the scientific background and rationale for the investigation being reported – <b>Page 5</b>                                                                                                                                                                                                                                                                                                     |
| Objectives                   | 3       | State specific objectives, including any prespecified hypotheses – <b>Pages 5, 6</b>                                                                                                                                                                                                                                                                                                                     |
| <b>Methods</b>               |         |                                                                                                                                                                                                                                                                                                                                                                                                          |
| Study design                 | 4       | Present key elements of study design early in the paper – <b>Page 6, 7</b>                                                                                                                                                                                                                                                                                                                               |
| Setting                      | 5       | Describe the setting, locations, and relevant dates, including periods of recruitment, exposure, follow-up, and data collection – <b>Pages 6-8</b>                                                                                                                                                                                                                                                       |
| Participants                 | 6       | (a) Give the eligibility criteria, and the sources and methods of selection of participants. Describe methods of follow-up – <b>Pages 7, 8</b><br>(b) For matched studies, give matching criteria and number of exposed and unexposed – <b>n/a</b>                                                                                                                                                       |
| Variables                    | 7       | Clearly define all outcomes, exposures, predictors, potential confounders, and effect modifiers. Give diagnostic criteria, if applicable – <b>Pages 7-9</b>                                                                                                                                                                                                                                              |
| Data sources/<br>measurement | 8*      | For each variable of interest, give sources of data and details of methods of assessment (measurement). Describe comparability of assessment methods if there is more than one group – <b>Pages 7-9</b>                                                                                                                                                                                                  |
| Bias                         | 9       | Describe any efforts to address potential sources of bias – <b>Pages 7-9</b>                                                                                                                                                                                                                                                                                                                             |
| Study size                   | 10      | Explain how the study size was arrived at – <b>Pages 6-7</b>                                                                                                                                                                                                                                                                                                                                             |
| Quantitative variables       | 11      | Explain how quantitative variables were handled in the analyses. If applicable, describe which groupings were chosen and why – <b>Pages 8, 9</b>                                                                                                                                                                                                                                                         |
| Statistical methods          | 12      | (a) Describe all statistical methods, including those used to control for confounding – <b>Pages 8, 9</b><br>(b) Describe any methods used to examine subgroups and interactions – <b>n/a</b><br>(c) Explain how missing data were addressed – <b>Page 7</b><br>(d) If applicable, explain how loss to follow-up was addressed – <b>n/a</b><br>(e) Describe any sensitivity analyses – <b>Pages 8, 9</b> |
| <b>Results</b>               |         |                                                                                                                                                                                                                                                                                                                                                                                                          |
| Participants                 | 13*     | (a) Report numbers of individuals at each stage of study—eg numbers potentially eligible, examined for eligibility, confirmed eligible, included in the study, completing follow-up, and analysed – <b>Figure 2</b><br>(b) Give reasons for non-participation at each stage – <b>Figure 2</b><br>(c) Consider use of a flow diagram – <b>Figure 2</b>                                                    |
| Descriptive data             | 14*     | (a) Give characteristics of study participants (eg demographic, clinical, social) and information on exposures and potential confounders – <b>Table 2</b><br>(b) Indicate number of participants with missing data for each variable of interest – <b>Table 2</b><br>(c) Summarise follow-up time (eg, average and total amount) – <b>n/a</b>                                                            |
| Outcome data                 | 15*     | Report numbers of outcome events or summary measures over time – <b>Page 14</b>                                                                                                                                                                                                                                                                                                                          |
| Main results                 | 16      | (a) Give unadjusted estimates and, if applicable, confounder-adjusted estimates and their precision (eg, 95% confidence interval). Make clear which confounders were                                                                                                                                                                                                                                     |

|                          |    |                                                                                                                                                                                                  |
|--------------------------|----|--------------------------------------------------------------------------------------------------------------------------------------------------------------------------------------------------|
|                          |    | adjusted for and why they were included – <b>Pages 9-14</b>                                                                                                                                      |
|                          |    | (b) Report category boundaries when continuous variables were categorized – <b>Table 3</b>                                                                                                       |
|                          |    | (c) If relevant, consider translating estimates of relative risk into absolute risk for a meaningful time period – <b>n/a</b>                                                                    |
| Other analyses           | 17 | Report other analyses done—eg analyses of subgroups and interactions, and sensitivity analyses – <b>Supplemental Material, Table 1</b>                                                           |
| <b>Discussion</b>        |    |                                                                                                                                                                                                  |
| Key results              | 18 | Summarise key results with reference to study objectives – <b>Page 14</b>                                                                                                                        |
| Limitations              | 19 | Discuss limitations of the study, taking into account sources of potential bias or imprecision. Discuss both direction and magnitude of any potential bias – <b>Pages 15, 16</b>                 |
| Interpretation           | 20 | Give a cautious overall interpretation of results considering objectives, limitations, multiplicity of analyses, results from similar studies, and other relevant evidence – <b>Pages 15, 16</b> |
| Generalisability         | 21 | Discuss the generalisability (external validity) of the study results – <b>Page 15</b>                                                                                                           |
| <b>Other information</b> |    |                                                                                                                                                                                                  |
| Funding                  | 22 | Give the source of funding and the role of the funders for the present study and, if applicable, for the original study on which the present article is based – <b>Page 17</b>                   |

\*Give information separately for exposed and unexposed groups.

**Note:** An Explanation and Elaboration article discusses each checklist item and gives methodological background and published examples of transparent reporting. The STROBE checklist is best used in conjunction with this article (freely available on the Web sites of PLoS Medicine at <http://www.plosmedicine.org/>, Annals of Internal Medicine at <http://www.annals.org/>, and Epidemiology at <http://www.epidem.com/>). Information on the STROBE Initiative is available at <http://www.strobe-statement.org>.
