# Supplementary material for: Profile of trauma mortality and trauma care resources at rural emergency departments and urban trauma centres in Quebec: a population-based, retrospective cohort study
Source: PubMed Central journal article supplement — BMJ Open. 2019 Jun 2;9(6):e028512. doi: 10.1136/bmjopen-2018-028512 (PMC6549736; doi:10.1136/bmjopen-2018-028512), 2019-06-02
Supplement: bmjopen-2018-028512supp001.pdf [file bmjopen-2018-028512supp001.pdf]

**Supplementary Table 1. Sensitivity analysis of the relationship between rural ED admission and trauma mortality**

| Variable                                      | Prehospital or ED mortality,<br>Adjusted OR <sup>1</sup> (95% CI) | In-hospital mortality,<br>Adjusted OR <sup>1</sup> (95% CI) |
|-----------------------------------------------|-------------------------------------------------------------------|-------------------------------------------------------------|
| Admitting facility (Ref: Urban trauma centre) |                                                                   |                                                             |
| Rural ED                                      | 4.49 (2.23-9.02)                                                  | 1.24 (0.80-1.92)                                            |
| Age (Ref: ≥ 65)                               |                                                                   |                                                             |
| 0-15 years                                    | 1.21 (0.66-2.20)                                                  | 0.16 (0.08-0.31)                                            |
| 16-64 years                                   | 1.04 (0.83-1.30)                                                  | 0.26 (0.22-0.31)                                            |
| Male                                          | 1.15 (0.94-1.40)                                                  | 0.98 (0.84-1.13)                                            |
| ISS (Ref: ≥ 25)                               |                                                                   |                                                             |
| 16-24                                         | 0.21 (0.17-0.26)                                                  | 0.25 (0.21-0.29)                                            |
| Injury mechanism (Ref: Other)                 |                                                                   |                                                             |
| Fall                                          | 0.18 (0.13-0.24)                                                  | 0.91 (0.69-1.20)                                            |
| MVC                                           | 0.44 (0.32-0.63)                                                  | 0.68 (0.48-0.96)                                            |
| Penetrating injury (Ref: None)                |                                                                   |                                                             |
| Lower/upper limbs                             | 3.51 (1.30-9.51)                                                  | 2.56 (0.68-9.66)                                            |
| Thorax/abdomen/back                           | 3.84 (2.83-5.22)                                                  | 1.21 (0.76-1.94)                                            |
| Scene of injury (Ref: Other)                  |                                                                   |                                                             |
| Road/street                                   | 1.41 (1.04-1.91)                                                  | 1.04 (0.80-1.34)                                            |
| Domicile                                      | 1.52 (1.19-1.93)                                                  | 1.44 (1.22-1.70)                                            |
| Cranio-cerebral trauma                        | 0.99 (0.82-1.19)                                                  | 1.29 (1.12-1.50)                                            |
| Ambulance transport                           | 4.33 (2.63-7.13)                                                  | 5.07 (3.57-7.21)                                            |
| Transfer                                      | 0.01 (0.00-0.02)                                                  | 0.83 (0.50-1.36)                                            |

ED, emergency department; OR, odds ratio; CI, confidence interval; MVC, motor vehicle collision.  
<sup>1</sup>Adjusted for age, sex, Injury Severity Score, injury mechanism, scene of injury, penetrating injury, cranio-cerebral trauma, ambulance transport and transfer.
