# Supplementary figures and images for: Profile of trauma mortality and trauma care resources at rural emergency departments and urban trauma centres in Quebec: a population-based, retrospective cohort study
Source: PubMed Central journal article supplement — BMJ Open. 2019 Jun 2;9(6):e028512. doi: 10.1136/bmjopen-2018-028512 (PMC6549736; doi:10.1136/bmjopen-2018-028512), 2019-06-02

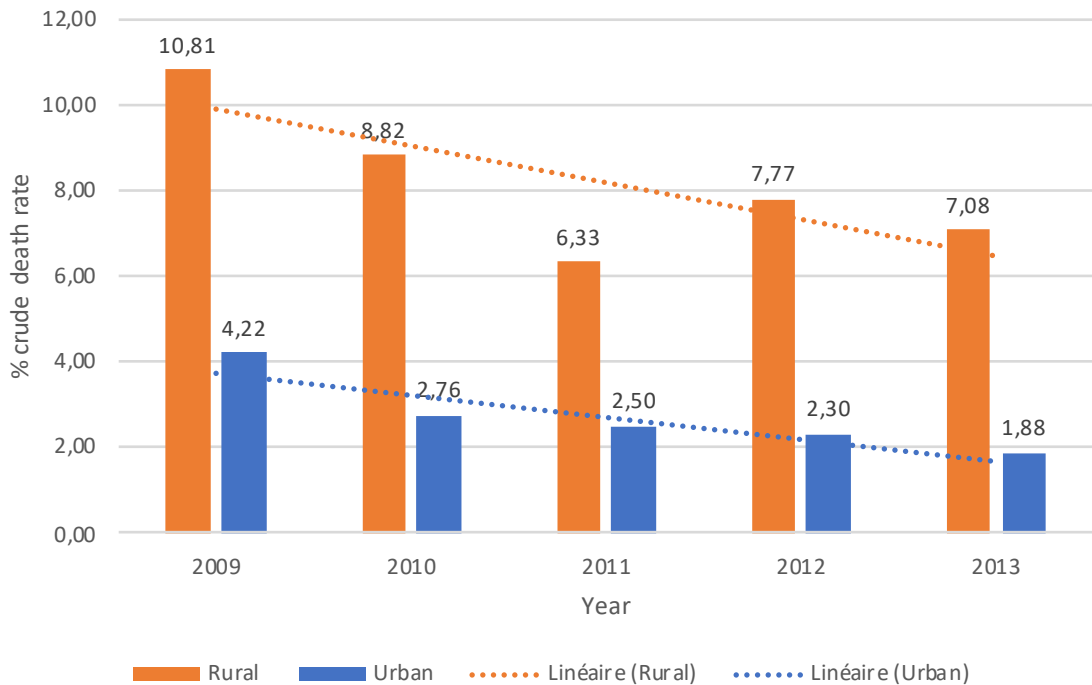

Supplement: bmjopen-2018-028512supp002.pdf [file bmjopen-2018-028512supp002.pdf]
